# Supplementary material for: A sharp Pif1-dependent threshold separates DNA double-strand breaks from critically short telomeres
Source: eLife. 2017 Aug 3;6:e23783. doi: 10.7554/eLife.23783 (PMC5595431; doi:10.7554/eLife.23783)
Supplement: Figure 1—figure supplement 1—source data 1. [file elife-23783-fig1-figsupp1-data1.xlsx]

## Sheet: Sheet1
Figure 1 Supplement 1 - source data 1
	Corresponds to Data shown in Figure 1 Supplement 1a
	n=6 experiments, error bars represent s.d.
	PIF1						pif1-m2
	Exp 1	Exp 2	Exp 3	Exp 4	Exp 5	Exp 6	Exp 1	Exp 2	Exp 3	Exp 4	Exp 5	Exp 6
TG18	0	0	0.0274725	0.0347985	0.021978	0.0201465	0.910256	0.965201	0.946886	1.00366	0.992674	1.18132
TG34	0.959088	0.948226	0.905865	1.04164	1.00905	1.06879	0.912382	1.01448	0.959088	1.05358	1.0134	1.04707
TG45	0.895799	0.931403	0.945644	1.01685	1.07382	1.03252	0.942796	0.968431	0.967007	1.0553	1.09518	0.971279
TG56	0.918974	0.807722	0.762001	1.01956	1.06985	0.911354	0.999746	0.93269	0.944882	1.09423	1.08204	0.946406
TG67	0.7946	0.796651	0.714627	0.875598	0.887902	0.830485	0.985304	0.976077	1.00479	1.00889	1.01401	1.01094
TG82	1.00587	0.998826	0.995809	1.00587	1.00587	1.00184	0.994803	1.00084	1.00184	0.99078	1.00587	1.00587
