# Supplementary material for: A sharp Pif1-dependent threshold separates DNA double-strand breaks from critically short telomeres
Source: eLife. 2017 Aug 3;6:e23783. doi: 10.7554/eLife.23783 (PMC5595431; doi:10.7554/eLife.23783)
Supplement: Figure 1—figure supplement 1—source data 2. [file elife-23783-fig1-figsupp1-data2.xlsx]

## Sheet: Sheet1
Figure 1 Supplement 1 - source data 2
	Corresponds to Data shown in Figure 1 Supplement 1b
	n=3 experiments, error bars represent s.d.
		PIF1		pif1-m2
		mean	s.d.	mean	s.d.
rad52Δ + noc	TG18	0.163399	0.231081	74.0979	1.27571
	TG34	89.1492	5.91728	94.6437	2.59261
rad52Δ - noc	TG18	1.43848	0.352545	74.495	4.13571
	TG34	91.1947	4.51258	88.1692	1.31997
RAD52 + noc	TG18	0.421071	0.274801	30.5568	1.17395
	TG34	80.6834	4.24781	89.1246	4.80202
