# Supplementary material for: A sharp Pif1-dependent threshold separates DNA double-strand breaks from critically short telomeres
Source: eLife. 2017 Aug 3;6:e23783. doi: 10.7554/eLife.23783 (PMC5595431; doi:10.7554/eLife.23783)
Supplement: Figure 1—figure supplement 1—source data 3. [file elife-23783-fig1-figsupp1-data3.xlsx]

## Sheet: Sheet1
Figure 1 Supplement 1 - source data 3
	Corresponds to Data shown in Figure 1 Supplement 1c
	n=3 experiments, error bars represent s.d.
	PIF1			pif1-m2
	Exp 1	Exp 2	Exp 3	Exp 1	Exp 2	Exp 3
TG26a	0.247	0.232	0	1.092	0.993	0.915
TG36a	0.966	0.658	1.271	0.778	1.222	1
TG26b	0.094	0.023	0	0.964	1.138	0.898
TG36b	1.031	1.155	1.004	0.91	1.11	0.98
TG26c	0.146	0.124	0.197	1.057	0.971	0.972
TG36c	0.846	0.905	0.919	0.99	0.953	1.057
