# Supplementary material for: A sharp Pif1-dependent threshold separates DNA double-strand breaks from critically short telomeres
Source: eLife. 2017 Aug 3;6:e23783. doi: 10.7554/eLife.23783 (PMC5595431; doi:10.7554/eLife.23783)
Supplement: Figure 1—source data 1. [file elife-23783-fig1-data1.xlsx]

## Sheet: Sheet1
Figure 1-source data 1
	Correspond to data shown in Figure 1c
	n=6 experiments, error bars represent s.d.
	PIF1						pif1-m2
	Exp 1	Exp 2	Exp 3	Exp 4	Exp 5	Exp 6	Exp 1	Exp 2	Exp 3	Exp 4	Exp 5	Exp 6
TG18	0	0	1.5	1.9	1.2	1.1	49.7	52.7	51.7	54.8	54.2	64.5
TG34	88.3	87.3	83.4	95.9	92.9	98.4	84	93.4	88.3	97	93.3	96.4
TG45	62.9	65.4	66.4	71.4	75.4	72.5	66.2	68	67.9	74.1	76.9	68.2
TG56	60.3	53	50	66.9	70.2	59.8	65.6	61.2	62	71.8	71	62.1
TG67	77.5	77.7	69.7	85.4	86.6	81	96.1	95.2	98	98.4	98.9	98.6
TG82	100	99.3	99	100	100	99.6	98.9	99.5	99.6	98.5	100	100
