# Supplementary material for: A sharp Pif1-dependent threshold separates DNA double-strand breaks from critically short telomeres
Source: eLife. 2017 Aug 3;6:e23783. doi: 10.7554/eLife.23783 (PMC5595431; doi:10.7554/eLife.23783)
Supplement: Figure 1—source data 2. [file elife-23783-fig1-data2.xlsx]

## Sheet: Sheet1
Figure 1 - source data 2
	Corresponds to Data shown in Figure 1e
	n=3 to 6 experiments, error bars represent s.d.
	PIF1						pif1-m2
	Exp 1	Exp 2	Exp 3	Exp 4			Exp 1	Exp 2	Exp 3	Exp 4	Exp 5	Exp 6
TG18	0.08	0.02	0.06	0.08			0.96	1.02	1.02
TG22	0	0.05	0.02	0.02			0.91	0.9		1.18
TG26	0.04	0.01	0.02	0.03			0.81	1.01	0.99	1.19
TG30	0.15	0.16	0.27	0.26			0.92	0.9	1.08	1.11
TG34	0.7	0.65	0.74	1.01			0.65	0.95	1.12	1.28
TG38	1.054	1.041	1.013				1.21606	1.07808	1.10578	0.817134	0.805991	0.976959
