# Supplementary material for: A sharp Pif1-dependent threshold separates DNA double-strand breaks from critically short telomeres
Source: eLife. 2017 Aug 3;6:e23783. doi: 10.7554/eLife.23783 (PMC5595431; doi:10.7554/eLife.23783)
Supplement: Figure 2—figure supplement 1—source data 1. [file elife-23783-fig2-figsupp1-data1.xlsx]

## Sheet: Sheet1
Figure 2 Supplement 1 - source data 1
	Corresponds to Data shown in Figure 2 Supplement 1a
	All telomeres					All telomeres except those with only wild-type sequence divergence
Strain	Telo #	Length (nt)	Undiverged (nt)	Diverged (mut)	Diverged (wt)	Telo #	Length (nt)	Undiverged (nt)	Diverged (mut)	Diverged (wt)
VI-R PIF1	#1	229	229	0		#1	229	229	0
	#2	227	227	0		#2	227	227	0
	#3	221	221	0		#3	221	221	0
	#4	221	221	0		#4	221	221	0
	#5	208	208	0		#5	208	208	0
	#6	208	208	0		#6	208	208	0
	#7	199	199	0		#7	199	199	0
	#8	197	197	0		#8	197	197	0
	#9	197	197	0		#9	197	197	0
	#10	196	196	0		#10	196	196	0
	#11	193	193	0		#11	193	193	0
	#12	191	191	0		#12	191	191	0
	#13	191	191	0		#13	191	191	0
	#14	188	188	0		#14	188	188	0
	#15	185	185	0		#15	185	185	0
	#16	183	183	0		#16	183	183	0
	#17	183	183	0		#17	183	183	0
	#18	183	183	0		#18	183	183	0
	#19	181	181	0		#19	181	181	0
	#20	181	181	0		#20	181	181	0
	#21	179	179	0		#21	179	179	0
	#22	177	177	0		#22	177	177	0					# of VI-R PIF1 telomeres
	#23	177	177	0		#23	177	177	0			Experiment #1	Clone 3	11
	#24	176	176	0		#24	176	176	0				Clone 4	84
	#25	175	175	0		#25	175	175	0				Clone 5	264
	#26	175	175	0		#26	175	175	0				Clone 6	20
	#27	174	174	0		#27	174	174	0				Clone 7	16
	#28	173	173	0		#28	173	173	0			Experiment #2	Clone 8	15
	#29	172	172	0		#29	172	172	0				Clone 9	16
	#30	171	171	0		#30	171	171	0				Clone 10	16
	#31	170	170	0		#31	170	170	0				Clone 11	114
	#32	170	170	0		#32	170	170	0				Clone 12	15
	#33	169	169	0		#33	169	169	0				Clone 13	13
	#34	169	169	0		#34	169	169	0			**TOTAL		584
	#35	168	168	0		#35	168	168	0			**In the final figure there are 583 VI-R PIF1 telomeres instead of 584. The missing telomeres were removed because they were considered to be multiple amplifications of the same telomere.
	#36	167	167	0		#36	167	167	0
	#37	166	166	0		#37	166	166	0
	#38	164	164	0		#38	164	164	0
	#39	163	163	0		#39	163	163	0
	#40	162	162	0		#40	162	162	0
	#41	162	162	0		#41	162	162	0
	#42	160	160	0		#42	160	160	0
	#43	160	160	0		#43	160	160	0
	#44	182	159	23		#44	182	159	23
	#45	158	158	0		#45	158	158	0
	#46	157	157	0		#46	157	157	0
	#47	157	157	0		#47	157	157	0
	#48	157	157	0		#48	157	157	0
	#49	169	157	12		#49	169	157	12
	#50	157	157	0		#50	157	157	0
	#51	157	157	0		#51	157	157	0
	#52	157	157	0		#52	157	157	0
	#53	153	153	0		#53	153	153	0
	#54	152	152	0		#54	152	152	0
	#55	149	149	0		#55	149	149	0
	#56	149	149	0		#56	149	149	0
	#57	148	148	0		#57	148	148	0
	#58	148	148	0		#58	148	148	0
	#59	147	147	0		#59	147	147	0
	#60	146	146	0		#60	146	146	0
	#61	146	146	0		#61	146	146	0
	#62	146	146	0		#62	146	146	0
	#63	145	145	0		#63	145	145	0
	#64	145	145	0		#64	145	145	0
	#65	145	145	0		#65	145	145	0
	#66	145	145	0		#66	145	145	0
	#67	145	145	0		#67	145	145	0
	#68	144	144	0		#68	144	144	0
	#69	144	144	0		#69	144	144	0
	#70	144	144	0		#70	144	144	0
	#71	142	142	0		#71	142	142	0
	#72	159	141	18		#72	159	141	18
	#73	141	141	0		#73	141	141	0
	#74	157	141	16		#74	157	141	16
	#75	140	140	0		#75	140	140	0
	#76	140	140	0		#76	140	140	0
	#77	140	140	0		#77	140	140	0
	#78	139	139	0		#78	139	139	0
	#79	139	139	0		#79	139	139	0
	#80	139	139	0		#80	139	139	0
	#81	139	139	0		#81	139	139	0
	#82	139	139	0		#82	139	139	0
	#83	139	139	0		#83	139	139	0
	#84	139	139	0		#84	139	139	0
	#85	138	138	0		#85	138	138	0
	#86	246	138	0	108
	#87	138	138	0		#87	138	138	0
	#88	137	137	0		#88	137	137	0
	#89	136	136	0		#89	136	136	0
	#90	138	135	0	3
	#91	135	135	0		#91	135	135	0
	#92	135	135	0		#92	135	135	0
	#93	135	135	0		#93	135	135	0
	#94	134	134	0		#94	134	134	0
	#95	134	134	0		#95	134	134	0
	#96	134	134	0		#96	134	134	0
	#97	134	134	0		#97	134	134	0
	#98	131	131	0		#98	131	131	0
	#99	131	131	0		#99	131	131	0
	#100	131	131	0		#100	131	131	0
	#101	131	131	0		#101	131	131	0
	#102	130	130	0		#102	130	130	0
	#103	130	130	0		#103	130	130	0
	#104	135	130	5		#104	135	130	5
	#105	130	130	0		#105	130	130	0
	#106	130	130	0		#106	130	130	0
	#107	132	129	0	3
	#108	129	129	0		#108	129	129	0
	#109	129	129	0		#109	129	129	0
	#110	129	129	0		#110	129	129	0
	#111	129	129	0		#111	129	129	0
	#112	129	129	0		#112	129	129	0
	#113	128	128	0		#113	128	128	0
	#114	128	128	0		#114	128	128	0
	#115	128	128	0		#115	128	128	0
	#116	127	127	0		#116	127	127	0
	#117	127	127	0		#117	127	127	0
	#118	127	127	0		#118	127	127	0
	#119	127	127	0		#119	127	127	0
	#120	126	126	0		#120	126	126	0
	#121	126	126	0		#121	126	126	0
	#122	126	126	0		#122	126	126	0
	#123	126	126	0		#123	126	126	0
	#124	126	126	0		#124	126	126	0
	#125	126	126	0		#125	126	126	0
	#126	126	126	0		#126	126	126	0
	#127	126	126	0		#127	126	126	0
	#128	125	125	0		#128	125	125	0
	#129	125	125	0		#129	125	125	0
	#130	124	124	0		#130	124	124	0
	#131	124	124	0		#131	124	124	0
	#132	132	124	0	8
	#133	129	124	0	5
	#134	140	124	16		#134	140	124	16
	#135	135	124	11		#135	135	124	11
	#136	136	124	12		#136	136	124	12
	#137	134	124	10		#137	134	124	10
	#138	124	124	0		#138	124	124	0
	#139	124	124	0		#139	124	124	0
	#140	133	123	0	10
	#141	130	123	7		#141	130	123	7
	#142	123	123	0		#142	123	123	0
	#143	123	123	0		#143	123	123	0
	#144	123	123	0		#144	123	123	0
	#145	122	122	0		#145	122	122	0
	#146	122	122	0		#146	122	122	0
	#147	150	122	28		#147	150	122	28
	#148	122	122	0		#148	122	122	0
	#149	122	122	0		#149	122	122	0
	#150	121	121	0		#150	121	121	0
	#151	121	121	0		#151	121	121	0
	#152	121	121	0		#152	121	121	0
	#153	121	121	0		#153	121	121	0
	#154	130	120	10		#154	130	120	10
	#155	143	120	23		#155	143	120	23
	#156	120	120	0		#156	120	120	0
	#157	120	120	0		#157	120	120	0
	#158	119	119	0		#158	119	119	0
	#159	118	118	0		#159	118	118	0
	#160	137	118	19		#160	137	118	19
	#161	146	118	28		#161	146	118	28
	#162	118	118	0		#162	118	118	0
	#163	118	118	0		#163	118	118	0
	#164	118	118	0		#164	118	118	0
	#165	140	117	23		#165	140	117	23
	#166	117	117	0		#166	117	117	0
	#167	117	117	0		#167	117	117	0
	#168	116	116	0		#168	116	116	0
	#169	174	116	58		#169	174	116	58
	#170	116	116	0		#170	116	116	0
	#171	116	116	0		#171	116	116	0
	#172	116	116	0		#172	116	116	0
	#173	116	116	0		#173	116	116	0
	#174	116	116	0		#174	116	116	0
	#175	116	116	0		#175	116	116	0
	#176	116	116	0		#176	116	116	0
	#177	116	116	0		#177	116	116	0
	#178	116	116	0		#178	116	116	0
	#179	116	116	0		#179	116	116	0
	#180	116	116	0		#180	116	116	0
	#181	115	115	0		#181	115	115	0
	#182	213	115	0	98
	#183	124	115	9		#183	124	115	9
	#184	115	115	0		#184	115	115	0
	#185	128	115	13		#185	128	115	13
	#186	115	115	0		#186	115	115	0
	#187	127	115	12		#187	127	115	12
	#188	132	115	17		#188	132	115	17
	#189	115	115	0		#189	115	115	0
	#190	115	115	0		#190	115	115	0
	#191	115	115	0		#191	115	115	0
	#192	115	115	0		#192	115	115	0
	#193	114	114	0		#193	114	114	0
	#194	114	114	0		#194	114	114	0
	#195	114	114	0		#195	114	114	0
	#196	114	114	0		#196	114	114	0
	#197	114	114	0		#197	114	114	0
	#198	114	114	0		#198	114	114	0
	#199	114	114	0		#199	114	114	0
	#200	114	114	0		#200	114	114	0
	#201	114	114	0		#201	114	114	0
	#202	114	114	0		#202	114	114	0
	#203	114	114	0		#203	114	114	0
	#204	113	113	0		#204	113	113	0
	#205	113	113	0		#205	113	113	0
	#206	113	113	0		#206	113	113	0
	#207	112	112	0		#207	112	112	0
	#208	112	112	0		#208	112	112	0
	#209	112	112	0		#209	112	112	0
	#210	112	112	0		#210	112	112	0
	#211	112	112	0		#211	112	112	0
	#212	111	111	0		#212	111	111	0
	#213	134	111	0	23
	#214	111	111	0		#214	111	111	0
	#215	111	111	0		#215	111	111	0
	#216	111	111	0		#216	111	111	0
	#217	110	110	0		#217	110	110	0
	#218	114	110	0	4
	#219	210	110	0	100
	#220	110	110	0		#220	110	110	0
	#221	110	110	0		#221	110	110	0
	#222	126	110	16		#222	126	110	16
	#223	110	110	0		#223	110	110	0
	#224	110	110	0		#224	110	110	0
	#225	136	110	26		#225	136	110	26
	#226	109	109	0		#226	109	109	0
	#227	109	109	0		#227	109	109	0
	#228	108	108	0		#228	108	108	0
	#229	108	108	0		#229	108	108	0
	#230	108	108	0		#230	108	108	0
	#231	107	107	0		#231	107	107	0
	#232	107	107	0		#232	107	107	0
	#233	107	107	0		#233	107	107	0
	#234	107	107	0		#234	107	107	0
	#235	107	107	0		#235	107	107	0
	#236	107	107	0		#236	107	107	0
	#237	106	106	0		#237	106	106	0
	#238	106	106	0		#238	106	106	0
	#239	106	106	0		#239	106	106	0
	#240	106	106	0		#240	106	106	0
	#241	106	106	0		#241	106	106	0
	#242	106	106	0		#242	106	106	0
	#243	106	106	0		#243	106	106	0
	#244	105	105	0		#244	105	105	0
	#245	105	105	0		#245	105	105	0
	#246	135	105	30		#246	135	105	30
	#247	105	105	0		#247	105	105	0
	#248	105	105	0		#248	105	105	0
	#249	104	104	0		#249	104	104	0
	#250	104	104	0		#250	104	104	0
	#251	123	103	20		#251	123	103	20
	#252	103	103	0		#252	103	103	0
	#253	103	103	0		#253	103	103	0
	#254	125	102	23		#254	125	102	23
	#255	104	102	2		#255	104	102	2
	#256	113	102	11		#256	113	102	11
	#257	102	102	2		#257	102	102	2
	#258	101	101	0		#258	101	101	0
	#259	101	101	0		#259	101	101	0
	#260	188	101	35	52	#260	188	101	35	52	35 bp mutant sequence added to a 101 bp wt telomere
	#261	101	101	0		#261	101	101	0
	#262	109	100	0	9
	#263	167	100	67		#263	167	100	67
	#264	119	100	0	19
	#265	100	100	0		#265	100	100	0
	#266	145	100	45		#266	145	100	45
	#267	116	100	16		#267	116	100	16
	#268	121	100	21		#268	121	100	21
	#269	100	100	0		#269	100	100	0
	#270	103	99	0	4
	#271	99	99	0		#271	99	99	0
	#272	172	99	73		#272	172	99	73
	#273	99	99	0		#273	99	99	0
	#274	109	99	10		#274	109	99	10
	#275	98	98	0		#275	98	98	0
	#276	98	98	0		#276	98	98	0
	#277	98	98	0		#277	98	98	0
	#278	98	98	0		#278	98	98	0
	#279	98	98	0		#279	98	98	0
	#280	98	98	0		#280	98	98	0
	#281	98	98	0		#281	98	98	0
	#282	98	98	0		#282	98	98	0
	#283	98	98	0		#283	98	98	0
	#284	97	97	0		#284	97	97	0
	#285	97	97	0		#285	97	97	0
	#286	97	97	0		#286	97	97	0
	#287	97	97	0		#287	97	97	0
	#288	132	96	36		#288	132	96	36
	#289	105	96	0	9
	#290	96	96	0		#290	96	96	0
	#291	96	96	0		#291	96	96	0
	#292	96	96	0		#292	96	96	0
	#293	96	96	0		#293	96	96	0
	#294	96	96	0		#294	96	96	0
	#295	96	96	0		#295	96	96	0
	#296	96	96	0		#296	96	96	0
	#297	98	96	2		#297	98	96	2
	#298	95	95	0		#298	95	95	0
	#299	95	95	0		#299	95	95	0
	#300	95	95	0		#300	95	95	0
	#301	95	95	0		#301	95	95	0
	#302	128	94	34		#302	128	94	34
	#303	94	94	0		#303	94	94	0
	#304	94	94	0		#304	94	94	0
	#305	94	94	0		#305	94	94	0
	#306	111	94	17		#306	111	94	17
	#307	99	94	0	5
	#308	94	94	0		#308	94	94	0
	#309	93	93	0		#309	93	93	0
	#310	93	93	0		#310	93	93	0
	#311	93	93	0		#311	93	93	0
	#312	93	93	0		#312	93	93	0
	#313	126	93	33		#313	126	93	33
	#314	120	93	27		#314	120	93	27
	#315	93	93	0		#315	93	93	0
	#316	102	93	9		#316	102	93	9
	#317	92	92	0		#317	92	92	0
	#318	92	92	0		#318	92	92	0
	#319	92	92	0		#319	92	92	0
	#320	92	92	0		#320	92	92	0
	#321	92	92	0		#321	92	92	0
	#322	92	92	0		#322	92	92	0
	#323	92	92	0		#323	92	92	0
	#324	92	92	0		#324	92	92	0
	#325	92	92	0		#325	92	92	0
	#326	91	91	0		#326	91	91	0
	#327	91	91	0		#327	91	91	0
	#328	131	91	40		#328	131	91	40
	#329	91	91	0		#329	91	91	0
	#330	91	91	0		#330	91	91	0
	#331	90	90	0		#331	90	90	0
	#332	112	90	22		#332	112	90	22
	#333	94	90	4		#333	94	90	4
	#334	112	90	0	22
	#335	89	89	0		#335	89	89	0
	#336	89	89	0		#336	89	89	0
	#337	89	89	0		#337	89	89	0
	#338	88	88	0		#338	88	88	0
	#339	157	88	69		#339	157	88	69
	#340	93	88	0	5
	#341	88	88	0		#341	88	88	0
	#342	103	88	15		#342	103	88	15
	#343	109	87	22		#343	109	87	22
	#344	139	87	52		#344	139	87	52
	#345	99	87	0	12
	#346	87	87	0		#346	87	87	0
	#347	87	87	0		#347	87	87	0
	#348	87	87	0		#348	87	87	0
	#349	87	87	0		#349	87	87	0
	#350	87	87	0		#350	87	87	0
	#351	87	87	0		#351	87	87	0
	#352	86	86	0		#352	86	86	0
	#353	86	86	0		#353	86	86	0
	#354	86	86	0		#354	86	86	0
	#355	86	86	0		#355	86	86	0
	#356	86	86	0		#356	86	86	0
	#357	86	86	0		#357	86	86	0
	#358	86	86	0		#358	86	86	0
	#359	86	86	0		#359	86	86	0
	#360	86	86	0		#360	86	86	0
	#361	85	85	0		#361	85	85	0
	#362	85	85	0		#362	85	85	0
	#363	85	85	0		#363	85	85	0
	#364	85	85	0		#364	85	85	0
	#365	85	85	0		#365	85	85	0
	#366	85	85	0		#366	85	85	0
	#367	84	84	0		#367	84	84	0
	#368	84	84	0		#368	84	84	0
	#369	84	84	0		#369	84	84	0
	#370	84	84	0		#370	84	84	0
	#371	84	84	0		#371	84	84	0
	#372	84	84	0		#372	84	84	0
	#373	84	84	0		#373	84	84	0
	#374	84	84	0		#374	84	84	0
	#375	117	84	33		#375	117	84	33
	#376	84	84	0		#376	84	84	0
	#377	132	83	49		#377	132	83	49
	#378	83	83	0		#378	83	83	0
	#379	130	82	48		#379	130	82	48
	#380	82	82	0		#380	82	82	0
	#381	82	82	0		#381	82	82	0
	#382	91	82	0	9
	#383	96	82	0	14
	#384	82	82	0		#384	82	82	0
	#385	82	82	0		#385	82	82	0
	#386	81	81	0		#386	81	81	0
	#387	81	81	0		#387	81	81	0
	#388	92	81	11		#388	92	81	11
	#389	81	81	0		#389	81	81	0
	#390	97	81	16		#390	97	81	16
	#391	81	81	0		#391	81	81	0
	#392	81	81	0		#392	81	81	0
	#393	80	80	0		#393	80	80	0
	#394	80	80	0		#394	80	80	0
	#395	80	80	0		#395	80	80	0
	#396	80	80	0		#396	80	80	0
	#397	80	80	0		#397	80	80	0
	#398	107	79	28		#398	107	79	28
	#399	95	79	16		#399	95	79	16
	#400	118	79	39		#400	118	79	39
	#401	79	79	0		#401	79	79	0
	#402	79	79	0		#402	79	79	0
	#403	91	79	12		#403	91	79	12
	#404	106	79	27		#404	106	79	27
	#405	94	79	15		#405	94	79	15
	#406	79	79	0		#406	79	79	0
	#407	96	79	17		#407	96	79	17
	#408	90	79	11		#408	90	79	11
	#409	79	79	0		#409	79	79	0
	#410	78	78	0		#410	78	78	0
	#411	78	78	0		#411	78	78	0
	#412	78	78	0		#412	78	78	0
	#413	78	78	0		#413	78	78	0
	#414	77	77	0		#414	77	77	0
	#415	77	77	0		#415	77	77	0
	#416	93	77	16		#416	93	77	16
	#417	92	77	15		#417	92	77	15
	#418	94	77	17		#418	94	77	17
	#419	124	77	47		#419	124	77	47
	#420	77	77	0		#420	77	77	0
	#421	77	77	0		#421	77	77	0
	#422	77	77	0		#422	77	77	0
	#423	88	77	11		#423	88	77	11
	#424	76	76	0		#424	76	76	0
	#425	76	76	0		#425	76	76	0
	#426	76	76	0		#426	76	76	0
	#427	76	76	0		#427	76	76	0
	#428	76	76	0		#428	76	76	0
	#429	76	76	0		#429	76	76	0
	#430	76	76	0		#430	76	76	0
	#431	75	75	0		#431	75	75	0
	#432	75	75	0		#432	75	75	0
	#433	80	75	0	5
	#434	81	75	0	6
	#435	112	75	37		#435	112	75	37
	#436	128	75	40	3	#436	128	75	40	3	40 bp mutant sequence added to a 75 bp wt telomere
	#437	121	75	46		#437	121	75	46
	#438	74	74	0		#438	74	74	0
	#439	74	74	0		#439	74	74	0
	#440	74	74	0		#440	74	74	0
	#441	74	74	0		#441	74	74	0
	#442	73	73	0		#442	73	73	0
	#443	83	73	10		#443	83	73	10
	#444	84	73	11		#444	84	73	11
	#445	73	73	0		#445	73	73	0
	#446	107	73	34		#446	107	73	34
	#447	78	73	0		#447	78	73	0
	#448	92	73	19		#448	92	73	19
	#449	94	73	21		#449	94	73	21
	#450	97	73	24		#450	97	73	24
	#451	92	73	19		#451	92	73	19
	#452	82	73	9		#452	82	73	9
	#453	73	73	0		#453	73	73	0
	#454	73	73	0		#454	73	73	0
	#455	72	72	0		#455	72	72	0
	#456	72	72	0		#456	72	72	0
	#457	72	72	0		#457	72	72	0
	#458	72	72	0		#458	72	72	0
	#459	72	72	0		#459	72	72	0
	#460	72	72	0		#460	72	72	0
	#461	71	71	0		#461	71	71	0
	#462	71	71	0		#462	71	71	0
	#463	71	71	0		#463	71	71	0
	#464	71	71	0		#464	71	71	0
	#465	70	70	0		#465	70	70	0
	#466	69	69	0		#466	69	69	0
	#467	69	69	0		#467	69	69	0
	#468	102	69	33		#468	102	69	33
	#469	72	69	3		#469	72	69	3
	#470	68	68	0		#470	68	68	0
	#471	68	68	0		#471	68	68	0
	#472	93	68	25		#472	93	68	25
	#473	67	67	0		#473	67	67	0
	#474	67	67	0		#474	67	67	0
	#475	67	67	0		#475	67	67	0
	#476	67	67	0		#476	67	67	0
	#477	67	67	0		#477	67	67	0
	#478	66	66	0		#478	66	66	0
	#479	66	66	0		#479	66	66	0
	#480	65	65	0		#480	65	65	0
	#481	87	65	22		#481	87	65	22
	#482	65	65	0		#482	65	65	0
	#483	65	65	0		#483	65	65	0
	#484	64	64	0		#484	64	64	0
	#485	64	64	0		#485	64	64	0
	#486	67	64	3		#486	67	64	3
	#487	63	63	0		#487	63	63	0
	#488	63	63	0		#488	63	63	0
	#489	63	63	0		#489	63	63	0
	#490	124	63	61		#490	124	63	61
	#491	104	63	0	41
	#492	82	63	19		#492	82	63	19
	#493	63	63	0		#493	63	63	0
	#494	104	63	41		#494	104	63	41
	#495	78	63	15		#495	78	63	15
	#496	63	63	0		#496	63	63	0
	#497	70	63	0	7
	#498	82	63	19		#498	82	63	19
	#499	84	62	22		#499	84	62	22
	#500	71	62	9		#500	71	62	9
	#501	80	62	18		#501	80	62	18
	#502	62	62	0		#502	62	62	0
not same sequence as #504	#503	85	62	23		#503	85	62	23
not same sequence as #503	#504	85	62	23		#504	85	62	23
	#505	62	62	0		#505	62	62	0
	#506	122	61	61		#506	122	61	61
	#507	61	61	0		#507	61	61	0
	#508	133	60	0	73
	#509	64	60	0	4
	#510	74	60	14		#510	74	60	14
	#511	60	60	0		#511	60	60	0
	#512	88	60	28		#512	88	60	28
	#513	59	59	0		#513	59	59	0
	#514	59	59	0		#514	59	59	0
	#515	59	59	0		#515	59	59	0
	#516	87	58	29		#516	87	58	29
	#517	58	58	0		#517	58	58	0
	#518	72	57	15		#518	72	57	15
	#519	131	57	74		#519	131	57	74
	#520	56	56	0		#520	56	56	0
	#521	120	55	65		#521	120	55	65
	#522	63	55	8		#522	63	55	8
	#523	64	55	9		#523	64	55	9
	#524	111	55	56		#524	111	55	56
	#525	67	55	0	12
	#526	84	55	29		#526	84	55	29
	#527	74	55	0	19
	#528	53	53	0		#528	53	53	0
	#529	53	53	0		#529	53	53	0
	#530	53	53	0		#530	53	53	0
	#531	53	53	0		#531	53	53	0
	#532	134	52	0	82
	#533	54	52	0	2
	#534	52	52	0		#534	52	52	0
	#535	154	52	102		#535	154	52	102
	#536	108	52	56		#536	108	52	56
	#537	81	52	29		#537	81	52	29
	#538	83	52	31		#538	83	52	31
	#539	78	52	26		#539	78	52	26
	#540	50	50	0		#540	50	50	0
	#541	50	50	0		#541	50	50	0
	#542	61	50	11		#542	61	50	11
	#543	173	50	123		#543	173	50	123
	#544	56	48	8		#544	56	48	8
	#545	57	48	9		#545	57	48	9
	#546	48	48	0		#546	48	48	0
	#547	93	47	46		#547	93	47	46
	#548	51	47	4		#548	51	47	4
	#549	53	47	6		#549	53	47	6
	#550	47	47	0		#550	47	47	0
	#551	71	47	24		#551	71	47	24
	#552	169	46	0	123
	#553	116	46	33	37	#553	116	46	33	37	33 bp mutant sequence added to a 46 bp wt telomere
	#554	100	46	0	54
	#555	88	46	0	42
	#556	80	46	0	34
	#557	134	46	27	61	#557	134	46	27	61	27 bp mutant sequence added to a 46 bp wt telomere
	#558	45	45	0		#558	45	45	0
	#559	44	44	0		#559	44	44	0
	#560	43	43	0		#560	43	43	0
	#561	42	42	0		#561	42	42	0
	#562	58	41	17		#562	58	41	17
	#563	39	39	0		#563	39	39	0
	#564	56	38	18		#564	56	38	18
	#565	34	34	0		#565	34	34	0
	#566	61	33	0	28
	#567	95	33	0	62
	#568	60	33	0	27
	#569	80	28	0	52
	#570	169	28	63	78	#570	169	28	63	78	63 bp mutant sequence added to a 28 bp wt telomere
	#571	27	27	0		#571	27	27	0
	#572	27	27	0		#572	27	27	0
	#573	27	27	0		#573	27	27	0
	#574	25	25	0		#574	25	25	0
	#575	24	24	0		#575	24	24	0
	#576	79	22	9	48	#576	79	22	9	48	9 bp mutant sequence added to a 22 bp wt telomere
	#577	20	20	0		#577	20	20	0
1st wt, then mutant	#578	33	15	0	18
	#579	14	14	0		#579	14	14	0
	#580	12	12	0		#580	12	12	0
	#581	12	12	0		#581	12	12	0
	#582	11	11	0		#582	11	11	0
	#583	72	10	0	62
Average		107.883	99.7736				# of telomeres	# of divergent telomeres	Percentage	p value
% diverged				21.2693	7.89022	37<x<74	115	51	44.3478	0.0390201
Count				120	46	<38	13	2	15.3846
