# Supplementary material for: A sharp Pif1-dependent threshold separates DNA double-strand breaks from critically short telomeres
Source: eLife. 2017 Aug 3;6:e23783. doi: 10.7554/eLife.23783 (PMC5595431; doi:10.7554/eLife.23783)
Supplement: Figure 2—figure supplement 1—source data 2. [file elife-23783-fig2-figsupp1-data2.xlsx]

## Sheet: Sheet1
Figure 2 Supplement 1 - source data 2
	Corresponds to Data shown in Figure 2 Supplement 1b
	All telomeres					All telomeres except those with only wild-type sequence divergence
Strain	Telo #	Length (nt)	Undiverged (nt)	Diverged (mut)	Diverged (wt)	Telo #	Length (nt)	Undiverged (nt)	Diverged (mut)	Diverged (wt)
SSY292+tlc1-tm	#1	331	331	0		#1	331	331	0
VI-R pif1-m2	#2	322	322	0		#2	322	322	0
	#3	293	293	0		#3	293	293	0
	#4	286	286	0		#4	286	286	0
	#5	283	283	0		#5	283	283	0
	#6	280	280	0		#6	280	280	0
	#7	267	267	0		#7	267	267	0
	#8	264	264	0		#8	264	264	0
	#9	264	264	0		#9	264	264	0
	#10	263	263	0		#10	263	263	0
	#11	265	258	7		#11	265	258	7
	#12	256	256	0		#12	256	256	0
	#13	253	253	0		#13	253	253	0
	#14	252	252	0		#14	252	252	0
	#15	251	251	0		#15	251	251	0
	#16	248	248	0		#16	248	248	0
	#17	248	248	0		#17	248	248	0
	#18	247	247	0		#18	247	247	0
	#19	258	247	0	11
	#20	273	246	27		#20	273	246	27
	#21	254	246	0	8
	#22	244	244	0		#22	244	244	0
	#23	241	241	0		#23	241	241	0
	#24	239	239	0		#24	239	239	0
	#25	239	239	0		#25	239	239	0					# of VI-R pif1-m2 telomeres
	#26	239	239	0		#26	239	239	0			Experiment #1	Clone 1	163
	#27	239	239	0		#27	239	239	0				Clone 2	15
	#28	238	238	0		#28	238	238	0				Clone 3	15
	#29	238	238	0		#29	238	238	0				Clone 4	137
	#30	237	237	0		#30	237	237	0				Clone 5	15
	#31	235	235	0		#31	235	235	0				Clone 6	37
	#32	235	235	0		#32	235	235	0			Experiment #2	Clone 7	8
	#33	289	234	55		#33	289	234	55				Clone 8	16
	#34	233	233	0		#34	233	233	0				Clone 9	16
	#35	232	232	0		#35	232	232	0				Clone 10	15
	#36	231	231	0		#36	231	231	0				Clone 11	14
	#37	231	231	0		#37	231	231	0				Clone 12	15
	#38	229	229	0		#38	229	229	0			Experiment #3	Clone 13	27
	#39	228	228	0		#39	228	228	0				Clone 14	22
	#40	228	228	0		#40	228	228	0				Clone 15	29
	#41	227	227	0		#41	227	227	0				Clone 16	28
	#42	227	227	0		#42	227	227	0			TOTAL		572
	#43	226	226	0		#43	226	226	0
	#44	226	226	0		#44	226	226	0
	#45	225	225	0		#45	225	225	0
	#46	225	225	0		#46	225	225	0
	#47	225	225	0		#47	225	225	0
	#48	223	223	0		#48	223	223	0
	#49	222	222	0		#49	222	222	0
	#50	237	222	15		#50	237	222	15
	#51	221	221	0		#51	221	221	0
	#52	220	220	0		#52	220	220	0
	#53	220	220	0		#53	220	220	0
	#54	245	219	0	26
	#55	218	218	0		#55	218	218	0
	#56	218	218	0		#56	218	218	0
	#57	247	217	30		#57	247	217	30
	#58	216	216	0		#58	216	216	0
	#59	225	216	9		#59	225	216	9
	#60	272	216	0	56
	#61	215	215	0		#61	215	215	0
	#62	215	215	0		#62	215	215	0
	#63	222	214	0	8
	#64	213	213	0		#64	213	213	0
	#65	213	213	0		#65	213	213	0
	#66	212	212	0		#66	212	212	0
	#67	210	210	0		#67	210	210	0
	#68	209	209	0		#68	209	209	0
	#69	208	208	0		#69	208	208	0
	#70	208	208	0		#70	208	208	0
	#71	208	208	0		#71	208	208	0
	#72	207	207	0		#72	207	207	0
	#73	207	207	0		#73	207	207	0
	#74	206	206	0		#74	206	206	0
	#75	206	206	0		#75	206	206	0
	#76	205	205	0		#76	205	205	0
	#77	205	205	0		#77	205	205	0
	#78	205	205	0		#78	205	205	0
	#79	205	205	0		#79	205	205	0
	#80	204	204	0		#80	204	204	0
	#81	239	204	8	27	#81	239	204	8	27	8 bp mutant sequence added to a 204 bp wt telomere
	#82	243	204	39		#82	243	204	39
	#83	219	204	15		#83	219	204	15
	#84	212	204	8		#84	212	204	8
	#85	203	203	0		#85	203	203	0
	#86	201	201	0		#86	201	201	0
	#87	200	200	0		#87	200	200	0
	#88	200	200	0		#88	200	200	0
	#89	200	200	0		#89	200	200	0
	#90	200	200	0		#90	200	200	0
	#91	200	200	0		#91	200	200	0
	#92	199	199	0		#92	199	199	0
	#93	198	198	0		#93	198	198	0
	#94	207	198	0	9
	#95	203	198	0	5
	#96	198	198	0		#96	198	198	0
	#97	233	196	37		#97	233	196	37
	#98	195	195	0		#98	195	195	0
	#99	194	194	0		#99	194	194	0
	#100	208	194	0	14
	#101	194	194	0		#101	194	194	0
	#102	194	194	0		#102	194	194	0
	#103	193	193	0		#103	193	193	0
	#104	201	193	0	8
	#105	192	192	0		#105	192	192	0
	#106	192	192	0		#106	192	192	0
	#107	192	192	0		#107	192	192	0
	#108	191	191	0		#108	191	191	0
	#109	191	191	0		#109	191	191	0
	#110	191	191	0		#110	191	191	0
	#111	190	190	0		#111	190	190	0
	#112	190	190	0		#112	190	190	0
	#113	190	190	0		#113	190	190	0
	#114	189	189	0		#114	189	189	0
	#115	188	188	0		#115	188	188	0
	#116	187	187	0		#116	187	187	0
	#117	187	187	0		#117	187	187	0
	#118	187	187	0		#118	187	187	0
	#119	186	186	0		#119	186	186	0
	#120	186	186	0		#120	186	186	0
	#121	185	185	0		#121	185	185	0
	#122	184	184	0		#122	184	184	0
	#123	212	183	29		#123	212	183	29
	#124	183	183	0		#124	183	183	0
	#125	183	183	0		#125	183	183	0
	#126	182	182	0		#126	182	182	0
	#127	180	180	0		#127	180	180	0
	#128	180	180	0		#128	180	180	0
	#129	180	180	0		#129	180	180	0
	#130	180	180	0		#130	180	180	0
	#131	180	180	0		#131	180	180	0
	#132	180	180	0		#132	180	180	0
	#133	180	180	0		#133	180	180	0
	#134	179	179	0		#134	179	179	0
	#135	179	179	0		#135	179	179	0
	#136	205	178	0	27
	#137	204	177	27		#137	204	177	27
	#138	177	177	0		#138	177	177	0
	#139	184	177	7		#139	184	177	7
	#140	176	176	0		#140	176	176	0
	#141	175	175	0		#141	175	175	0
	#142	174	174	0		#142	174	174	0
	#143	173	173	0		#143	173	173	0
	#144	173	173	0		#144	173	173	0
	#145	205	172	33		#145	205	172	33
	#146	210	171	0	39
	#147	171	171	0		#147	171	171	0
	#148	171	171	0		#148	171	171	0
	#149	203	171	32		#149	203	171	32
	#150	177	171	6		#150	177	171	6
	#151	473	171	302		#151	473	171	302
	#152	168	168	0		#152	168	168	0
	#153	167	167	0		#153	167	167	0
	#154	189	165	24		#154	189	165	24
	#155	165	165	0		#155	165	165	0
	#156	216	164	52		#156	216	164	52
	#157	185	162	23		#157	185	162	23
	#158	231	161	0	70
	#159	160	160	0		#159	160	160	0
	#160	160	160	0		#160	160	160	0
	#161	157	157	0		#161	157	157	0
	#162	164	157	7		#162	164	157	7
	#163	157	157	0		#163	157	157	0
	#164	163	157	0	6
	#165	155	155	0		#165	155	155	0
	#166	155	155	0		#166	155	155	0
	#167	206	154	24	28	#167	206	154	24	28	28 bp mutant sequence added to a 178 bp wt telomere
	#168	154	154	0		#168	154	154	0
	#169	153	153	0		#169	153	153	0
	#170	158	152	0	6
	#171	149	149	0		#171	149	149	0
	#172	161	149	12		#172	161	149	12
	#173	162	149	13		#173	162	149	13
	#174	149	149	0		#174	149	149	0
	#175	147	147	0		#175	147	147	0
	#176	146	146	0		#176	146	146	0
	#177	180	146	34		#177	180	146	34
	#178	146	146	0		#178	146	146	0
	#179	145	145	0		#179	145	145	0
	#180	144	144	0		#180	144	144	0
	#181	154	143	11		#181	154	143	11
	#182	141	141	0		#182	141	141	0
	#183	141	141	0		#183	141	141	0
	#184	141	141	0		#184	141	141	0
	#185	141	141	0		#185	141	141	0
	#186	168	141	27		#186	168	141	27
	#187	140	140	0		#187	140	140	0
	#188	140	140	0		#188	140	140	0
	#189	140	140	0		#189	140	140	0
	#190	140	140	0		#190	140	140	0
	#191	140	140	0		#191	140	140	0
	#192	139	139	0		#192	139	139	0
	#193	139	139	0		#193	139	139	0
	#194	137	137	0		#194	137	137	0
	#195	137	137	0		#195	137	137	0
	#196	137	137	0		#196	137	137	0
	#197	136	136	0		#197	136	136	0
	#198	135	135	0		#198	135	135	0
	#199	153	135	18		#199	153	135	18
	#200	135	135	0		#200	135	135	0
	#201	134	134	0		#201	134	134	0
	#202	134	134	0		#202	134	134	0
	#203	133	133	0		#203	133	133	0
	#204	133	133	0		#204	133	133	0
	#205	131	131	0		#205	131	131	0
	#206	131	131	0		#206	131	131	0
	#207	131	131	0		#207	131	131	0
	#208	157	131	26		#208	157	131	26
	#209	131	131	0		#209	131	131	0
	#210	157	130	27		#210	157	130	27
	#211	177	130	47		#211	177	130	47
	#212	149	130	19		#212	149	130	19
	#213	129	129	0		#213	129	129	0
	#214	129	129	0		#214	129	129	0
	#215	133	129	0	4
	#216	129	129	0		#216	129	129	0
	#217	129	129	0		#217	129	129	0
	#218	128	128	0		#218	128	128	0
	#219	127	127	0		#219	127	127	0
	#220	150	127	23		#220	150	127	23
	#221	126	126	0		#221	126	126	0
	#222	125	125	0		#222	125	125	0
	#223	125	125	0		#223	125	125	0
	#224	190	124	66		#224	190	124	66
	#225	142	124	18		#225	142	124	18
	#226	148	124	24		#226	148	124	24
	#227	128	123	0	5
	#228	218	123	0	95
	#229	123	123	0		#229	123	123	0
	#230	122	122	0		#230	122	122	0
	#231	146	122	24		#231	146	122	24
	#232	121	121	0		#232	121	121	0
	#233	120	120	0		#233	120	120	0
	#234	119	119	0		#234	119	119	0
	#235	131	119	12		#235	131	119	12
	#236	119	119	0		#236	119	119	0
	#237	157	118	39		#237	157	118	39
	#238	146	118	28		#238	146	118	28
	#239	117	117	0		#239	117	117	0
	#240	138	117	21		#240	138	117	21
	#241	117	117	0		#241	117	117	0
	#242	160	117	43		#242	160	117	43
	#243	117	117	0		#243	117	117	0
	#244	128	117	11		#244	128	117	11
	#245	117	117	0		#245	117	117	0
	#246	117	117	0		#246	117	117	0
	#247	116	116	0		#247	116	116	0
	#248	116	116	0		#248	116	116	0
	#249	115	115	0		#249	115	115	0
	#250	115	115	0		#250	115	115	0
	#251	114	114	0		#251	114	114	0
	#252	113	113	0		#252	113	113	0
	#253	119	113	6		#253	119	113	6
	#254	113	113	0		#254	113	113	0
	#255	112	112	0		#255	112	112	0
	#256	111	111	0		#256	111	111	0
	#257	111	111	0		#257	111	111	0
	#258	111	111	0		#258	111	111	0
	#259	111	111	0		#259	111	111	0
	#260	111	111	0		#260	111	111	0
	#261	150	110	40		#261	150	110	40
	#262	265	109	156		#262	265	109	156
	#263	123	107	16		#263	123	107	16
	#264	107	107	0		#264	107	107	0
	#265	128	106	22		#265	128	106	22
	#266	144	106	38		#266	144	106	38
	#267	147	106	41		#267	147	106	41
	#268	106	106	0		#268	106	106	0
	#269	168	105	63		#269	168	105	63
	#270	179	105	74		#270	179	105	74
	#271	127	105	22		#271	127	105	22
	#272	104	104	0		#272	104	104	0
	#273	130	103	27		#273	130	103	27
	#274	103	103	0		#274	103	103	0
	#275	101	101	0		#275	101	101	0
	#276	100	100	0		#276	100	100	0
	#277	182	100	0	82
	#278	168	100	68		#278	168	100	68
	#279	134	100	34		#279	134	100	34
	#280	334	100	234		#280	334	100	234
	#281	155	99	56		#281	155	99	56
	#282	174	99	75		#282	174	99	75
	#283	99	99	0		#283	99	99	0
	#284	98	98	0		#284	98	98	0
	#285	137	97	40		#285	137	97	40
	#286	97	97	0		#286	97	97	0
	#287	97	97	0		#287	97	97	0
	#288	102	96	0	6
	#289	96	96	0		#289	96	96	0
	#290	157	96	61		#290	157	96	61
	#291	96	96	0		#291	96	96	0
	#292	432	95	337		#292	432	95	337
	#293	471	95	376		#293	471	95	376
	#294	310	95	215		#294	310	95	215
	#295	211	95	116		#295	211	95	116
	#296	224	95	62	67	#296	224	95	62	67	62 bp mutant sequence added to a 95 bp wt telomere
	#297	325	95	230		#297	325	95	230
	#298	139	95	44		#298	139	95	44
	#299	95	95	0		#299	95	95	0
	#300	95	95	0		#300	95	95	0
	#301	99	94	0	5
	#302	119	94	0	25
	#303	94	94	0		#303	94	94	0
	#304	93	93	0		#304	93	93	0
	#305	93	93	0		#305	93	93	0
	#306	92	92	0		#306	92	92	0
	#307	92	92	0		#307	92	92	0
	#308	92	92	0		#308	92	92	0
	#309	131	91	40		#309	131	91	40
	#310	91	91	0		#310	91	91	0
	#311	113	90	23		#311	113	90	23
	#312	321	90	231		#312	321	90	231
	#313	89	89	0		#313	89	89	0
	#314	89	89	0		#314	89	89	0
	#315	88	88	0		#315	88	88	0
	#316	96	88	0	8
	#317	140	88	52		#317	140	88	52
	#318	97	88	9		#318	97	88	9
	#319	103	88	15		#319	103	88	15
	#320	88	88	0		#320	88	88	0
	#321	148	88	60		#321	148	88	60
	#322	101	87	0	14
	#323	97	87	10		#323	97	87	10
	#324	86	86	0		#324	86	86	0
	#325	86	86	0		#325	86	86	0
	#326	86	86	0		#326	86	86	0
	#327	128	85	43		#327	128	85	43
	#328	85	85	0		#328	85	85	0
	#329	168	85	83		#329	168	85	83
	#330	111	84	27		#330	111	84	27
	#331	104	84	20		#331	104	84	20
	#332	98	84	14		#332	98	84	14
	#333	95	84	11		#333	95	84	11
	#334	84	84	0		#334	84	84	0
	#335	146	83	63		#335	146	83	63
	#336	117	83	34		#336	117	83	34
	#337	93	83	10		#337	93	83	10
	#338	164	83	81		#338	164	83	81
	#339	94	83	11		#339	94	83	11
	#340	117	83	34		#340	117	83	34
	#341	83	83	0		#341	83	83	0
	#342	86	83	0	3
	#343	83	83	0		#343	83	83	0
	#344	83	83	0		#344	83	83	0
	#345	89	83	6		#345	89	83	6
	#346	107	83	24		#346	107	83	24
	#347	123	83	40		#347	123	83	40
	#348	90	82	8		#348	90	82	8
	#349	165	82	83		#349	165	82	83
	#350	96	82	14		#350	96	82	14
	#351	92	82	10		#351	92	82	10
	#352	81	81	0		#352	81	81	0
	#353	81	81	0		#353	81	81	0
	#354	81	81	0		#354	81	81	0
	#355	81	81	0		#355	81	81	0
	#356	92	80	0	12
	#357	132	80	52		#357	132	80	52
	#358	80	80	0		#358	80	80	0
	#359	119	79	40		#359	119	79	40
	#360	79	79	0		#360	79	79	0
	#361	174	79	95		#361	174	79	95
	#362	79	79	0		#362	79	79	0
	#363	88	79	9		#363	88	79	9
	#364	83	79	0	4
	#365	98	79	0	19
	#366	94	79	15		#366	94	79	15
	#367	94	79	15		#367	94	79	15
	#368	102	79	23		#368	102	79	23
	#369	81	78	3		#369	81	78	3
	#370	78	78	0		#370	78	78	0
	#371	78	78	0		#371	78	78	0
	#372	78	78	0		#372	78	78	0
	#373	84	77	0	7
	#374	104	77	27		#374	104	77	27
	#375	88	77	11		#375	88	77	11
	#376	145	77	0	68
	#377	123	77	46		#377	123	77	46
	#378	132	77	55		#378	132	77	55
	#379	101	77	24		#379	101	77	24
	#380	77	77	0		#380	77	77	0
	#381	100	77	23		#381	100	77	23
	#382	92	77	15		#382	92	77	15
	#383	83	77	6		#383	83	77	6
	#384	109	77	32		#384	109	77	32
	#385	103	77	26		#385	103	77	26
	#386	92	76	0	16
	#387	113	76	37		#387	113	76	37
	#388	176	76	100		#388	176	76	100
	#389	81	76	5		#389	81	76	5
	#390	84	75	0	9
	#391	154	75	0	79
	#392	169	75	94		#392	169	75	94
	#393	123	75	35	13	#393	123	75	35	13	13 bp mutant sequence added to a 110 bp wt telomere: move to <120 and <125 groups
	#394	75	75	0		#394	75	75	0
	#395	116	75	41		#395	116	75	41
	#396	74	74	0		#396	74	74	0
	#397	126	74	52		#397	126	74	52
	#398	74	74	0		#398	74	74	0
	#399	120	74	46		#399	120	74	46
	#400	129	74	55		#400	129	74	55
	#401	173	74	99		#401	173	74	99
	#402	182	74	108		#402	182	74	108
	#403	83	74	9		#403	83	74	9
	#404	171	74	97		#404	171	74	97
	#405	179	74	105		#405	179	74	105
	#406	74	74	0		#406	74	74	0
	#407	253	74	20	137	#407	253	74	20	137	137 bp mutant sequence added to a 94 bp wt telomere
	#408	132	74	58		#408	132	74	58
	#409	118	74	44		#409	118	74	44
	#410	107	74	20	13	#410	107	74	20	13	13 bp mutant sequence added to a 94 bp wt telomere
	#411	74	74	0		#411	74	74	0
	#412	108	73	35		#412	108	73	35
	#413	97	73	24		#413	97	73	24
	#414	181	73	108		#414	181	73	108
	#415	80	73	7		#415	80	73	7
	#416	99	73	26		#416	99	73	26
	#417	85	73	12		#417	85	73	12
	#418	132	73	59		#418	132	73	59
	#419	106	73	33		#419	106	73	33
	#420	87	72	15		#420	87	72	15
	#421	72	72	0		#421	72	72	0
	#422	72	72	0		#422	72	72	0
	#423	83	72	11		#423	83	72	11
	#424	180	72	108		#424	180	72	108
	#425	126	72	54		#425	126	72	54
	#426	72	72	0		#426	72	72	0
	#427	71	71	0		#427	71	71	0
	#428	69	69	0		#428	69	69	0
	#429	76	69	7		#429	76	69	7
	#430	103	69	34		#430	103	69	34
	#431	69	69	0		#431	69	69	0
	#432	169	68	101		#432	169	68	101
	#433	68	68	0		#433	68	68	0
	#434	82	68	0	14
	#435	68	68	0		#435	68	68	0
	#436	76	68	8		#436	76	68	8
	#437	68	68	0		#437	68	68	0
	#438	76	68	4	4	#438	76	68	4	4	4 bp mutant sequence added to a 72 bp wt telomere
	#439	88	68	20		#439	88	68	20
	#440	93	68	25		#440	93	68	25
	#441	67	67	0		#441	67	67	0
	#442	67	67	0		#442	67	67	0
	#443	67	67	0		#443	67	67	0
	#444	66	66	0		#444	66	66	0
	#445	66	66	0		#445	66	66	0
	#446	66	66	0		#446	66	66	0
	#447	66	66	0		#447	66	66	0
	#448	181	65	116		#448	181	65	116
	#449	64	64	0		#449	64	64	0
	#450	78	64	14		#450	78	64	14
	#451	96	64	32		#451	96	64	32
	#452	92	63	29		#452	92	63	29
	#453	84	63	21		#453	84	63	21
	#454	87	63	24		#454	87	63	24
	#455	63	63	0		#455	63	63	0
	#456	63	63	0		#456	63	63	0
	#457	114	63	51		#457	114	63	51
	#458	165	63	102		#458	165	63	102
	#459	63	63	0		#459	63	63	0
	#460	111	63	48		#460	111	63	48
	#461	104	62	42		#461	104	62	42
	#462	185	62	123		#462	185	62	123
	#463	62	62	0		#463	62	62	0
	#464	217	62	155		#464	217	62	155
	#465	152	62	90		#465	152	62	90
	#466	89	62	27		#466	89	62	27
	#467	67	62	5		#467	67	62	5
	#468	62	62	0		#468	62	62	0
	#469	62	62	0		#469	62	62	0
	#470	151	62	89		#470	151	62	89
	#471	62	62	0		#471	62	62	0
	#472	200	61	139		#472	200	61	139
	#473	61	61	0		#473	61	61	0
	#474	135	61	74		#474	135	61	74
	#475	137	60	77		#475	137	60	77
	#476	109	60	0	49
	#477	60	60	0		#477	60	60	0
	#478	88	60	17	11	#478	88	60	17	11	11 bp mutant sequence added to a 77 bp wt telomere
	#479	110	60	0		#479	110	60	0
	#480	110	59	51		#480	110	59	51
	#481	179	59	120		#481	179	59	120
	#482	97	59	38		#482	97	59	38
	#483	58	58	0		#483	58	58	0
	#484	152	58	94		#484	152	58	94
	#485	67	57	10		#485	67	57	10
	#486	116	57	59		#486	116	57	59
	#487	192	57	135		#487	192	57	135
	#488	102	57	45		#488	102	57	45
	#489	86	57	29		#489	86	57	29
	#490	57	57	0		#490	57	57	0
	#491	57	57	0		#491	57	57	0
	#492	146	57	89		#492	146	57	89
	#493	122	56	66		#493	122	56	66
	#494	89	55	34		#494	89	55	34
	#495	117	55	62		#495	117	55	62
	#496	101	55	46		#496	101	55	46
	#497	97	55	42		#497	97	55	42
	#498	135	55	0		#498	135	55	0
	#499	60	55	0	5
	#500	54	54	0		#500	54	54	0
	#501	65	54	11		#501	65	54	11
	#502	53	53	0		#502	53	53	0
	#503	53	53	0		#503	53	53	0
	#504	210	53	157		#504	210	53	157
	#505	52	52	0		#505	52	52	0
	#506	77	52	25		#506	77	52	25
	#507	95	52	43		#507	95	52	43
	#508	93	52	41		#508	93	52	41
	#509	147	52	0	95
	#510	192	52	0	140
	#511	77	52	25		#511	77	52	25
	#512	144	52	92		#512	144	52	92
	#513	134	52	82		#513	134	52	82
	#514	51	51	0		#514	51	51	0
	#515	91	50	41		#515	91	50	41
	#516	230	49	181		#516	230	49	181
	#517	103	49	54		#517	103	49	54
	#518	54	49	5		#518	54	49	5
	#519	85	48	37		#519	85	48	37
	#520	75	48	27		#520	75	48	27
	#521	116	47	69		#521	116	47	69
	#522	103	47	56		#522	103	47	56
	#523	81	47	34		#523	81	47	34
	#524	182	47	135		#524	182	47	135
	#525	124	47	77		#525	124	47	77
	#526	87	47	40		#526	87	47	40
	#527	73	47	26		#527	73	47	26
	#528	60	47	13		#528	60	47	13
	#529	200	47	153		#529	200	47	153
	#530	295	47	248		#530	295	47	248
	#531	58	47	11		#531	58	47	11
	#532	251	47	204		#532	251	47	204
	#533	93	47	46		#533	93	47	46
	#534	153	47	106		#534	153	47	106
	#535	165	47	118		#535	165	47	118
	#536	99	46	0	53
	#537	168	46	122		#537	168	46	122
	#538	110	46	64		#538	110	46	64
	#539	129	46	83		#539	129	46	83
	#540	93	46	0	47
	#541	103	46	57		#541	103	46	57
	#542	96	46	50		#542	96	46	50
	#543	55	46	9		#543	55	46	9
	#544	55	46	0	9
	#545	166	46	0	120
	#546	59	46	13		#546	59	46	13
	#547	165	46	44	75	#547	165	46	44	75	75 bp mutant sequence added to a 90 bp wt telomere
	#548	114	46	68		#548	114	46	68
	#549	203	46	157		#549	203	46	157
	#550	44	44	0		#550	44	44	0
	#551	60	43	17		#551	60	43	17
	#552	148	42	54	52	#552	148	42	54	52	52 bp mutant sequence added to a 96 bp wt telomere
	#553	86	42	44		#553	86	42	44
	#554	137	42	66	29	#554	137	42	66	29	29 bp mutant sequence added to a 108 bp wt telomere: move to <120 and <125 groups
	#555	106	42	64		#555	106	42	64
	#556	96	41	12	43	#556	96	41	12	43	43 bp mutant sequence added to a 53 bp wt telomere
	#557	103	41	62		#557	103	41	62
	#558	39	39	0		#558	39	39	0
	#559	38	38	0		#559	38	38	0
	#560	37	37	0		#560	37	37	0
	#561	37	37	0		#561	37	37	0
	#562	100	36	64		#562	100	36	64
	#563	177	33	0	144
	#564	72	33	0	39
	#565	41	29	12		#565	41	29	12
	#566	153	22	131		#566	153	22	131
	#567	59	20	33	6	#567	59	20	33	6	6 bp mutant sequence added to a 53 bp wt telomere: move to <100, <120 and <125 groups
	#568	208	20	0	188
	#569	61	20	0	41
	#570	62	16	0	46
	#571	16	16	0		#571	16	16	0
	#572	55	15	0	40
Average		146.009	119.575				# of telomeres below thershold	# of extended telomeres	p value
% diverged				41.2587	10.4895	VI-R PIF1	13	2	0.151
Count				236	60	VI-R pif1-m2	6	3
