# Supplementary material for: A sharp Pif1-dependent threshold separates DNA double-strand breaks from critically short telomeres
Source: eLife. 2017 Aug 3;6:e23783. doi: 10.7554/eLife.23783 (PMC5595431; doi:10.7554/eLife.23783)
Supplement: Figure 2—source data 1. [file elife-23783-fig2-data1.xlsx]

## Sheet: Sheet1
Figure 2 - source data 1
	Corresponds to Data shown in Figure 2c
	All telomeres					All telomeres except those with only wild-type sequence divergence
Strain	Telo #	Length (nt)	Undiverged (nt)	Diverged (mut)	Diverged (wt)	Telo #	Length (nt)	Undiverged (nt)	Diverged (mut)	Diverged (wt)
V-R PIF1	#1	204	204	0		#1	204	204	0
	#2	194	194	0		#2	194	194	0
	#3	193	193	0		#3	193	193	0
	#4	196	189	0	7
	#5	195	189	0	6
	#6	185	185	0		#6	185	185	0
	#7	181	181	0		#7	181	181	0
	#8	181	181	0		#8	181	181	0
	#9	180	180	0		#9	180	180	0
	#10	178	178	0		#10	178	178	0
	#11	175	175	0		#11	175	175	0
	#12	173	173	0		#12	173	173	0
	#13	173	173	0		#13	173	173	0
	#14	172	172	0		#14	172	172	0
	#15	171	171	0		#15	171	171	0
	#16	171	171	0		#16	171	171	0
	#17	170	170	0		#17	170	170	0
	#18	170	170	0		#18	170	170	0
	#19	167	167	0		#19	167	167	0
	#20	165	165	0		#20	165	165	0
	#21	163	163	0		#21	163	163	0
	#22	160	160	0		#22	160	160	0
	#23	180	160	20		#23	180	160	20
	#24	158	158	0		#24	158	158	0
	#25	158	158	0		#25	158	158	0					# of V-R PIF1 telomeres
	#26	158	158	0		#26	158	158	0			Experiment #1	Clone 1	11
	#27	178	157	21		#27	178	157	21				Clone 2	53
	#28	156	156	0		#28	156	156	0			Experiment #2	Clone 3	47
	#29	156	156	0		#29	156	156	0				Clone 4	47
	#30	156	156	0		#30	156	156	0				Clone 5	57
	#31	154	154	0		#31	154	154	0				Clone 6	10
	#32	153	153	0		#32	153	153	0				Clone 7	19
	#33	153	153	0		#33	153	153	0			Experiment #3	Clone 8	14
	#34	152	152	0		#34	152	152	0				Clone 9	16
	#35	152	152	0		#35	152	152	0				Clone 10	92
	#36	152	152	0		#36	152	152	0				Clone 11	85
	#37	152	152	0		#37	152	152	0				Clone 12	12
	#38	152	152	0		#38	152	152	0				Clone 13	10
	#39	151	151	0		#39	151	151	0			**TOTAL		473
	#40	151	151	0		#40	151	151	0			**In the final figure there are 471 V-R PIF1 telomeres instead of 473. The missing telomeres were removed because they were considered to be multiple amplifications of the same telomere.
	#41	150	150	0		#41	150	150	0
	#42	148	148	0		#42	148	148	0
	#43	148	148	0		#43	148	148	0
	#44	147	147	0		#44	147	147	0
	#45	147	147	0		#45	147	147	0
	#46	147	147	0		#46	147	147	0
	#47	147	147	0		#47	147	147	0
	#48	146	146	0		#48	146	146	0
	#49	146	146	0		#49	146	146	0
	#50	146	146	0		#50	146	146	0
	#51	145	145	0		#51	145	145	0
	#52	150	144	6		#52	150	144	6
	#53	142	142	0		#53	142	142	0
	#54	141	141	0		#54	141	141	0
	#55	141	141	0		#55	141	141	0
	#56	140	140	0		#56	140	140	0
	#57	140	140	0		#57	140	140	0
	#58	140	140	0		#58	140	140	0
	#59	142	139	0	3
	#60	138	138	0		#60	138	138	0
	#61	138	138	0		#61	138	138	0
	#62	138	138	0		#62	138	138	0
	#63	138	138	0		#63	138	138	0
	#64	138	138	0		#64	138	138	0
	#65	138	138	0		#65	138	138	0
	#66	137	137	0		#66	137	137	0
	#67	137	137	0		#67	137	137	0
	#68	137	137	0		#68	137	137	0
	#69	137	137	0		#69	137	137	0
	#70	137	137	0		#70	137	137	0
	#71	136	136	0		#71	136	136	0
	#72	136	136	0		#72	136	136	0
	#73	136	136	0		#73	136	136	0
	#74	136	136	0		#74	136	136	0
	#75	136	136	0		#75	136	136	0
	#76	136	136	0		#76	136	136	0
	#77	135	135	0		#77	135	135	0
	#78	135	135	0		#78	135	135	0
	#79	135	135	0		#79	135	135	0
	#80	134	134	0		#80	134	134	0
	#81	134	134	0		#81	134	134	0
	#82	134	134	0		#82	134	134	0
	#83	137	134	0	3
	#84	134	134	0		#84	134	134	0
	#85	139	134	0	5
	#86	150	134	16		#86	150	134	16
	#87	147	134	0	13	#87
	#88	133	133	0		#88	133	133	0
	#89	133	133	0		#89	133	133	0
	#90	132	132	0		#90	132	132	0
	#91	132	132	0		#91	132	132	0
	#92	132	132	0		#92	132	132	0
	#93	132	132	0		#93	132	132	0
	#94	132	132	0		#94	132	132	0
	#95	132	132	0		#95	132	132	0
	#96	132	132	0		#96	132	132	0
	#97	131	131	0		#97	131	131	0
	#98	131	131	0		#98	131	131	0
	#99	131	131	0		#99	131	131	0
	#100	131	131	0		#100	131	131	0
	#101	130	130	0		#101	130	130	0
	#102	130	130	0		#102	130	130	0
	#103	130	130	0		#103	130	130	0
	#104	130	130	0		#104	130	130	0
	#105	130	130	0		#105	130	130	0
	#106	130	130	0		#106	130	130	0
	#107	130	130	0		#107	130	130	0
	#108	129	129	0		#108	129	129	0
	#109	129	129	0		#109	129	129	0
	#110	129	129	0		#110	129	129	0
	#111	129	129	0		#111	129	129	0
	#112	129	129	0		#112	129	129	0
	#113	129	129	0		#113	129	129	0
	#114	129	129	0		#114	129	129	0
	#115	141	129	12		#115	141	129	12
	#116	129	129	0		#116	129	129	0
	#117	129	129	0		#117	129	129	0
	#118	128	128	0		#118	128	128	0
	#119	131	128	0	3
	#120	144	128	16		#120	144	128	16
	#121	133	128	0	5
	#122	127	127	0		#122	127	127	0
	#123	127	127	0		#123	127	127	0
	#124	127	127	0		#124	127	127	0
	#125	127	127	0		#125	127	127	0
	#126	127	127	0		#126	127	127	0
	#127	127	127	0		#127	127	127	0
	#128	126	126	0		#128	126	126	0
	#129	126	126	0		#129	126	126	0
	#130	125	125	0		#130	125	125	0
	#131	125	125	0		#131	125	125	0
	#132	125	125	0		#132	125	125	0
	#133	125	125	0		#133	125	125	0
	#134	125	125	0		#134	125	125	0
	#135	125	125	0		#135	125	125	0
	#136	125	125	0		#136	125	125	0
	#137	125	125	0		#137	125	125	0
	#138	125	125	0		#138	125	125	0
	#139	125	125	0		#139	125	125	0
	#140	125	125	0		#140	125	125	0
	#141	125	125	0		#141	125	125	0
	#142	125	125	0		#142	125	125	0
	#143	125	125	0		#143	125	125	0
	#144	125	125	0		#144	125	125	0
	#145	125	125	0		#145	125	125	0
	#146	124	124	0		#146	124	124	0
	#147	124	124	0		#147	124	124	0
	#148	124	124	0		#148	124	124	0
	#149	124	124	0		#149	124	124	0
	#150	124	124	0		#150	124	124	0
	#151	153	123	30		#151	153	123	30
	#152	127	123	0	4
	#153	140	123	0	17
	#154	125	122	0	3
	#155	140	122	18		#155	140	122	18
	#156	122	122	0		#156	122	122	0
	#157	122	122	0		#157	122	122	0
	#158	121	121	0		#158	121	121	0
	#159	121	121	0		#159	121	121	0
	#160	121	121	0		#160	121	121	0
	#161	127	120	0	7
	#162	120	120	0		#162	120	120	0
	#163	120	120	0		#163	120	120	0
	#164	119	119	0		#164	119	119	0
	#165	119	119	0		#165	119	119	0
	#166	119	119	0		#166	119	119	0
	#167	119	119	0		#167	119	119	0
	#168	119	119	0		#168	119	119	0
	#169	119	119	0		#169	119	119	0
	#170	119	119	0		#170	119	119	0
	#171	119	119	0		#171	119	119	0
	#172	119	119	0		#172	119	119	0
	#173	119	119	0		#173	119	119	0
	#174	119	119	0		#174	119	119	0
	#175	119	119	0		#175	119	119	0
	#176	119	119	0		#176	119	119	0
	#177	119	119	0		#177	119	119	0
	#178	118	118	0		#178	118	118	0
	#179	118	118	0		#179	118	118	0
	#180	118	118	0		#180	118	118	0
	#181	118	118	0		#181	118	118	0
	#182	118	118	0		#182	118	118	0
	#183	133	118	0	15
	#184	117	117	0		#184	117	117	0
	#185	116	116	0		#185	116	116	0
	#186	116	116	0		#186	116	116	0
	#187	116	116	0		#187	116	116	0
	#188	118	115	0	3
	#189	115	115	0		#189	115	115	0
	#190	115	115	0		#190	115	115	0
	#191	115	115	0		#191	115	115	0
	#192	115	115	0		#192	115	115	0
	#193	115	115	0		#193	115	115	0
	#194	114	114	0		#194	114	114	0
	#195	114	114	0		#195	114	114	0
	#196	148	114	7	34	#196	148	114	7	34	34 bp mutant sequence added to a 121 bp wt telomere: removed from <120 bp group
	#197	114	114	0		#197	114	114	0
	#198	114	114	0		#198	114	114	0
	#199	114	114	0		#199	114	114	0
	#200	114	114	0		#200	114	114	0
	#201	114	114	0		#201	114	114	0
	#202	113	113	0		#202	113	113	0
	#203	113	113	0		#203	113	113	0
	#204	113	113	0		#204	113	113	0
	#205	113	113	0		#205	113	113	0
	#206	122	112	10		#206	122	112	10
	#207	112	112	0		#207	112	112	0
	#208	112	112	0		#208	112	112	0
	#209	112	112	0		#209	112	112	0
	#210	112	112	0		#210	112	112	0
	#211	112	112	0		#211	112	112	0
	#212	112	112	0		#212	112	112	0
	#213	112	112	0		#213	112	112	0
	#214	163	111	52		#214	163	111	52
	#215	111	111	0		#215	111	111	0
	#216	111	111	0		#216	111	111	0
	#217	117	110	7		#217	117	110	7
	#218	110	110	0		#218	110	110	0
	#219	110	110	0		#219	110	110	0
	#220	110	110	0		#220	110	110	0
	#221	116	110	6		#221	116	110	6
	#222	116	110	6		#222	116	110	6
	#223	138	110	28		#223	138	110	28
	#224	113	109	0	4
	#225	109	109	0		#225	109	109	0
	#226	147	109	38		#226	147	109	38
	#227	163	107	56		#227	163	107	56
	#228	168	107	61		#228	168	107	61
	#229	113	107	0	6
	#230	161	107	54		#230	161	107	54
	#231	126	107	0	19
	#232	142	107	35		#232	142	107	35
	#233	107	107	0		#233	107	107	0
	#234	136	107	29		#234	136	107	29
	#235	106	106	0		#235	106	106	0
	#236	118	106	12		#236	118	106	12
	#237	105	105	0		#237	105	105	0
	#238	105	105	0		#238	105	105	0
	#239	104	104	0		#239	104	104	0
	#240	140	103	37		#240	140	103	37
	#241	159	102	57		#241	159	102	57
	#242	112	102	10		#242	112	102	10
	#243	101	101	0		#243	101	101	0
	#244	101	101	0		#244	101	101	0
	#245	101	101	0		#245	101	101	0
	#246	101	101	0		#246	101	101	0
	#247	101	101	0		#247	101	101	0
	#248	100	100	0		#248	100	100	0
	#249	197	99	98		#249	197	99	98
	#250	130	99	31		#250	130	99	31
	#251	119	99	20		#251	119	99	20
	#252	104	99	5		#252	104	99	5
	#253	98	98	0		#253	98	98	0
	#254	135	98	37		#254	135	98	37
	#255	98	98	0		#255	98	98	0
	#256	121	97	0	24
	#257	97	97	0		#257	97	97	0
	#258	133	97	36		#258	133	97	36
	#259	134	97	37		#259	134	97	37
	#260	97	97	0		#260	97	97	0
	#261	108	97	11		#261	108	97	11
	#262	146	97	49		#262	146	97	49
	#263	97	97	0		#263	97	97	0
	#264	96	96	0		#264	96	96	0
	#265	96	96	0		#265	96	96	0
	#266	99	96	0	3
	#267	133	96	37		#267	133	96	37
	#268	95	95	0		#268	95	95	0
	#269	95	95	0		#269	95	95	0
	#270	95	95	0		#270	95	95	0
	#271	95	95	0		#271	95	95	0
	#272	95	95	0		#272	95	95	0
	#273	95	95	0		#273	95	95	0
	#274	95	95	0		#274	95	95	0
	#275	94	94	0		#275	94	94	0
	#276	94	94	0		#276	94	94	0
	#277	93	93	0		#277	93	93	0
	#278	93	93	0		#278	93	93	0
	#279	92	92	0		#279	92	92	0
	#280	92	92	0		#280	92	92	0
	#281	105	89	16		#281	105	89	16
	#282	89	89	0		#282	89	89	0
	#283	89	89	0		#283	89	89	0
	#284	92	88	0	4
	#285	102	88	14		#285	102	88	14
	#286	120	88	32		#286	120	88	32
	#287	87	87	0		#287	87	87	0
	#288	198	87	111		#288	198	87	111
	#289	152	86	66		#289	152	86	66
	#290	91	86	0	5
	#291	87	85	0	2
	#292	83	83	0		#292	83	83	0
	#293	83	83	0		#293	83	83	0
	#294	83	83	0		#294	83	83	0
	#295	83	83	0		#295	83	83	0
	#296	89	83	0	6
	#297	83	83	0		#297	83	83	0
	#298	83	83	0		#298	83	83	0
	#299	83	83	0		#299	83	83	0
	#300	83	83	0		#300	83	83	0
	#301	86	82	4		#301	86	82	4
	#302	85	82	0	3
	#303	133	81	52		#303	133	81	52
	#304	81	81	0		#304	81	81	0
	#305	81	81	0		#305	81	81	0
	#306	81	81	0		#306	81	81	0
	#307	81	81	0		#307	81	81	0
	#308	81	81	0		#308	81	81	0
	#309	123	81	42		#309	123	81	42
	#310	91	81	10		#310	91	81	10
	#311	81	81	0		#311	81	81	0
	#312	84	81	0	3
	#313	106	80	26		#313	106	80	26
	#314	83	80	0	3
	#315	103	80	23		#315	103	80	23
	#316	90	80	10		#316	90	80	10
	#317	80	80	0		#317	80	80	0
	#318	110	78	0	32
	#319	110	78	32		#319	110	78	32
	#320	90	78	12		#320	90	78	12
	#321	78	78	0		#321	78	78	0
	#322	78	78	0		#322	78	78	0
	#323	104	78	26		#323	104	78	26
	#324	78	78	0		#324	78	78	0
	#325	125	77	48		#325	125	77	48
	#326	91	77	14		#326	91	77	14
	#327	77	77	0		#327	77	77	0
	#328	77	77	0		#328	77	77	0
	#329	154	77	32	45	#329	154	77	32	45	45 bp mutant sequence added to a 109 bp wt telomere: removed from <100 bp group
	#330	108	77	31		#330	108	77	31
	#331	77	77	0		#331	77	77	0
	#332	76	76	0		#332	76	76	0
	#333	76	76	0		#333	76	76	0
	#334	76	76	0		#334	76	76	0
	#335	76	76	0		#335	76	76	0
	#336	76	76	0		#336	76	76	0
	#337	76	76	0		#337	76	76	0
	#338	76	76	0		#338	76	76	0
	#339	76	76	0		#339	76	76	0
	#340	76	76	0		#340	76	76	0
	#341	76	76	0		#341	76	76	0
	#342	75	75	0		#342	75	75	0
	#343	104	75	29		#343	104	75	29
	#344	74	74	0		#344	74	74	0
	#345	73	73	0		#345	73	73	0
	#346	73	73	0		#346	73	73	0
	#347	73	73	0		#347	73	73	0
	#348	73	73	0		#348	73	73	0
	#349	83	73	10		#349	83	73	10
	#350	133	72	61		#350	133	72	61
	#351	113	72	41		#351	113	72	41
	#352	108	72	36		#352	108	72	36
	#353	93	72	21		#353	93	72	21
	#354	88	72	16		#354	88	72	16
	#355	125	72	53		#355	125	72	53
	#356	75	71	0	4
	#357	81	71	10		#357	81	71	10
	#358	71	71	0		#358	71	71	0
	#359	71	71	0		#359	71	71	0
	#360	91	71	20		#360	91	71	20
	#361	93	70	23		#361	93	70	23
	#362	70	70	0		#362	70	70	0
	#363	70	70	0		#363	70	70	0
	#364	96	70	26		#364	96	70	26
	#365	69	69	0		#365	69	69	0
	#366	67	67	0		#366	67	67	0
	#367	70	67	0	3
	#368	104	67	37		#368	104	67	37
	#369	67	67	0		#369	67	67	0
	#370	125	66	59		#370	125	66	59
	#371	128	66	62		#371	128	66	62
	#372	107	66	41		#372	107	66	41
	#373	66	66	0		#373	66	66	0
	#374	65	65	0		#374	65	65	0
	#375	65	65	0		#375	65	65	0
	#376	63	63	0		#376	63	63	0
	#377	83	63	20		#377	83	63	20
	#378	63	63	0		#378	63	63	0
	#379	62	62	0		#379	62	62	0
	#380	72	62	10		#380	72	62	10
	#381	62	62	0		#381	62	62	0
	#382	62	62	0		#382	62	62	0
	#383	62	62	0		#383	62	62	0
	#384	119	61	58		#384	119	61	58
	#385	88	61	27		#385	88	61	27
	#386	81	61	20		#386	81	61	20
	#387	140	61	79		#387	140	61	79
	#388	66	61	0	5
	#389	61	61	0		#389	61	61	0
	#390	65	61	4		#390	65	61	4
	#391	184	61	0	123
	#392	132	61	71		#392	132	61	71
	#393	105	60	0	45
	#394	75	60	15		#394	75	60	15
	#395	73	60	13		#395	73	60	13
	#396	60	60	0		#396	60	60	0
	#397	60	60	0		#397	60	60	0
	#398	118	60	58		#398	118	60	58
	#399	59	59	0		#399	59	59	0
	#400	59	59	0		#400	59	59	0
	#401	59	59	0		#401	59	59	0
	#402	59	59	0		#402	59	59	0
	#403	58	58	0		#403	58	58	0
	#404	93	56	37		#404	93	56	37
	#405	56	56	0		#405	56	56	0
	#406	77	56	21		#406	77	56	21
	#407	70	56	14		#407	70	56	14
	#408	76	56	20		#408	76	56	20
	#409	82	55	27		#409	82	55	27
	#410	94	55	39		#410	94	55	39
	#411	74	55	19		#411	74	55	19
	#412	55	55	0		#412	55	55	0
	#413	54	54	0		#413	54	54	0
	#414	146	53	93		#414	146	53	93
	#415	69	52	17		#415	69	52	17
	#416	52	52	0		#416	52	52	0
	#417	51	51	0		#417	51	51	0
	#418	51	51	0		#418	51	51	0
	#419	51	51	0		#419	51	51	0
	#420	81	50	31		#420	81	50	31
	#421	65	50	15		#421	65	50	15
	#422	77	50	27		#422	77	50	27
	#423	62	50	12		#423	62	50	12
	#424	51	47	0	4
	#425	58	47	11		#425	58	47	11
	#426	60	46	14		#426	60	46	14
	#427	71	46	25		#427	71	46	25
	#428	86	46	40		#428	86	46	40
	#429	91	46	45		#429	91	46	45
	#430	55	46	9		#430	55	46	9
	#431	45	45	0		#431	45	45	0
	#432	151	45	106		#432	151	45	106
	#433	45	45	0		#433	45	45	0
	#434	91	44	47		#434	91	44	47
	#435	53	44	9		#435	53	44	9
	#436	44	44	0		#436	44	44	0
	#437	47	44	3		#437	47	44	3
	#438	65	44	21		#438	65	44	21
	#439	43	43	0		#439	43	43	0
	#440	43	43	0		#440	43	43	0
	#441	42	42	0		#441	42	42	0
	#442	42	42	0		#442	42	42	0
	#443	42	42	0		#443	42	42	0
	#444	42	42	0		#444	42	42	0
	#445	42	42	0		#445	42	42	0
	#446	41	41	0		#446	41	41	0
	#447	38	38	0		#447	38	38	0
	#448	38	38	0		#448	38	38	0
	#449	38	38	0		#449	38	38	0
	#450	37	37	0		#450	37	37	0
	#451	62	33	29		#451	62	33	29
	#452	29	29	0		#452	29	29	0
	#453	26	26	0		#453	26	26	0
	#454	25	25	0		#454	25	25	0
	#455	25	25	0		#455	25	25	0
	#456	25	25	0		#456	25	25	0
	#457	22	22	0		#457	22	22	0
	#458	21	21	0		#458	21	21	0
	#459	21	21	0		#459	21	21	0
	#460	20	20	0		#460	20	20	0
	#461	20	20	0		#461	20	20	0
	#462	20	20	0		#462	20	20	0
	#463	18	18	0		#463	18	18	0
	#464	18	18	0		#464	18	18	0
	#465	16	16	0		#465	16	16	0
	#466	15	15	0		#466	15	15	0
	#467	15	15	0		#467	15	15	0
	#468	15	15	0		#468	15	15	0
	#469	19	14	0	5
	#470	73	8	65		#470	73	8	65
	#471	7	7	0		#471	7	7	0
Average		108	100				# of telomeres	# of divergent telomeres	Percentage	p value
% diverged				22.7	7.6	43<x<86	136	65	47.8	3.8e-06
Count				107	36	<44	32	2	6.3
