# Supplementary material for: A sharp Pif1-dependent threshold separates DNA double-strand breaks from critically short telomeres
Source: eLife. 2017 Aug 3;6:e23783. doi: 10.7554/eLife.23783 (PMC5595431; doi:10.7554/eLife.23783)
Supplement: Figure 2—source data 2. [file elife-23783-fig2-data2.xlsx]

## Sheet: Sheet1
Figure 2 - source data 1
	Corresponds to Data shown in Figure 2d
	All telomeres					All telomeres except those with only wild-type sequence divergence
Strain	Telo #	Length (nt)	Undiverged (nt)	Diverged (mut)	Diverged (wt)	Telo #	Length (nt)	Undiverged (nt)	Diverged (mut)	Diverged (wt)
SSY292+tlc1-tm	#1	345	345	0		#1	345	345	0
V-R pif1-m2	#2	255	255	0		#2	255	255	0
	#3	249	249	0		#3	249	249	0
	#4	247	247	0		#4	247	247	0
	#5	247	247	0		#5	247	247	0
	#6	246	246	0		#6	246	246	0
	#7	246	246	0		#7	246	246	0
	#8	245	245	0		#8	245	245	0
	#9	244	244	0		#9	244	244	0
	#10	240	240	0		#10	240	240	0
	#11	239	239	0		#11	239	239	0
	#12	238	238	0		#12	238	238	0
	#13	237	237	0		#13	237	237	0
	#14	236	236	0		#14	236	236	0
	#15	235	235	0		#15	235	235	0
	#16	234	234	0		#16	234	234	0
	#17	252	234	18		#17	252	234	18
	#18	232	232	0		#18	232	232	0
	#19	231	231	0		#19	231	231	0
	#20	228	228	0		#20	228	228	0
	#21	226	226	0		#21	226	226	0
	#22	226	226	0		#22	226	226	0
	#23	225	225	0		#23	225	225	0
	#24	224	224	0		#24	224	224	0
	#25	221	221	0		#25	221	221	0					# of V-R pif1-m2 telomeres
	#26	221	221	0		#26	221	221	0			Experiment #1	Clone 1	40
	#27	220	220	0		#27	220	220	0				Clone 2	10
	#28	220	220	0		#28	220	220	0				Clone 3	16
	#29	220	220	0		#29	220	220	0				Clone 4	124
	#30	219	219	0		#30	219	219	0				Clone 5	14
	#31	218	218	0		#31	218	218	0				Clone 6	120
	#32	215	215	0		#32	215	215	0			Experiment #2	Clone 7	20
	#33	214	214	0		#33	214	214	0				Clone 8	28
	#34	214	214	0		#34	214	214	0				Clone 9	24
	#35	214	214	0		#35	214	214	0				Clone 10	22
	#36	212	212	0		#36	212	212	0				Clone 11	28
	#37	210	210	0		#37	210	210	0				Clone 12	24
	#38	210	210	0		#38	210	210	0			TOTAL		470
	#39	209	209	0		#39	209	209	0
	#40	208	208	0		#40	208	208	0
	#41	208	208	0		#41	208	208	0
	#42	205	205	0		#42	205	205	0
	#43	210	205	5		#43	210	205	5
	#44	216	205	11		#44	216	205	11
	#45	205	205	0		#45	205	205	0
	#46	214	204	10		#46	214	204	10
	#47	204	204	0		#47	204	204	0
	#48	204	204	0		#48	204	204	0
	#49	223	202	21		#49	223	202	21
	#50	202	202	0		#50	202	202	0
	#51	218	201	17		#51	218	201	17
	#52	200	200	0		#52	200	200	0
	#53	199	199	0		#53	199	199	0
	#54	198	198	0		#54	198	198	0
	#55	198	198	0		#55	198	198	0
	#56	197	197	0		#56	197	197	0
	#57	197	197	0		#57	197	197	0
	#58	197	197	0		#58	197	197	0
	#59	196	196	0		#59	196	196	0
	#60	211	196	15		#60	211	196	15
	#61	209	195	14		#61	209	195	14
	#62	195	195	0		#62	195	195	0
	#63	195	195	0		#63	195	195	0
	#64	193	193	0		#64	193	193	0
	#65	209	193	16		#65	209	193	16
	#66	193	193	0		#66	193	193	0
	#67	192	192	0		#67	192	192	0
	#68	195	192	0	3
	#69	227	192	35		#69	227	192	35
	#70	191	191	0		#70	191	191	0
	#71	191	191	0		#71	191	191	0
	#72	191	191	0		#72	191	191	0
	#73	191	191	0		#73	191	191	0
	#74	191	191	0		#74	191	191	0
	#75	190	190	0		#75	190	190	0
	#76	190	190	0		#76	190	190	0
	#77	190	190	0		#77	190	190	0
	#78	189	189	0		#78	189	189	0
	#79	221	189	32		#79	221	189	32
	#80	188	188	0		#80	188	188	0
	#81	188	188	0		#81	188	188	0
	#82	187	187	0		#82	187	187	0
	#83	187	187	0		#83	187	187	0
	#84	186	186	0		#84	186	186	0
	#85	185	185	0		#85	185	185	0
	#86	185	185	0		#86	185	185	0
	#87	189	184	5		#87	189	184	5
	#88	196	184	12		#88	196	184	12
	#89	188	184	0	4
	#90	183	183	0		#90	183	183	0
	#91	183	183	0		#91	183	183	0
	#92	185	183	2		#92	185	183	2
	#93	182	182	0		#93	182	182	0
	#94	182	182	0		#94	182	182	0
	#95	180	180	0		#95	180	180	0
	#96	180	180	0		#96	180	180	0
	#97	180	180	0		#97	180	180	0
	#98	180	180	0		#98	180	180	0
	#99	179	179	0		#99	179	179	0
	#100	179	179	0		#100	179	179	0
	#101	179	179	0		#101	179	179	0
	#102	204	179	25		#102	204	179	25
	#103	186	178	0	8
	#104	178	178	0		#104	178	178	0
	#105	178	178	0		#105	178	178	0
	#106	178	178	0		#106	178	178	0
	#107	177	177	0		#107	177	177	0
	#108	177	177	0		#108	177	177	0
	#109	177	177	0		#109	177	177	0
	#110	176	176	0		#110	176	176	0
	#111	175	175	0		#111	175	175	0
	#112	207	175	32		#112	207	175	32
	#113	186	174	0	12
	#114	172	172	0		#114	172	172	0
	#115	171	171	0		#115	171	171	0
	#116	171	171	0		#116	171	171	0
	#117	170	170	0		#117	170	170	0
	#118	170	170	0		#118	170	170	0
	#119	169	169	0		#119	169	169	0
	#120	169	169	0		#120	169	169	0
	#121	176	169	0	7
	#122	203	169	34		#122	203	169	34
	#123	169	169	0		#123	169	169	0
	#124	168	168	0		#124	168	168	0
	#125	168	168	0		#125	168	168	0
	#126	187	168	19		#126	187	168	19
	#127	168	168	0		#127	168	168	0
	#128	167	167	0		#128	167	167	0
	#129	167	167	0		#129	167	167	0
	#130	167	167	0		#130	167	167	0
	#131	167	167	0		#131	167	167	0
	#132	179	166	13		#132	179	166	13
	#133	166	166	0		#133	166	166	0
	#134	186	165	21		#134	186	165	21
	#135	165	165	0		#135	165	165	0
	#136	165	165	0		#136	165	165	0
	#137	192	165	27		#137	192	165	27
	#138	164	164	0		#138	164	164	0
	#139	164	164	0		#139	164	164	0
	#140	164	164	0		#140	164	164	0
	#141	164	164	0		#141	164	164	0
	#142	163	163	0		#142	163	163	0
	#143	163	163	0		#143	163	163	0
	#144	250	163	87		#144	250	163	87
	#145	162	162	0		#145	162	162	0
	#146	162	162	0		#146	162	162	0
	#147	162	162	0		#147	162	162	0
	#148	162	162	0		#148	162	162	0
	#149	187	161	26		#149	187	161	26
	#150	161	161	0		#150	161	161	0
	#151	161	161	0		#151	161	161	0
	#152	161	161	0		#152	161	161	0
	#153	187	161	26		#153	187	161	26
	#154	160	160	0		#154	160	160	0
	#155	252	160	46	46	#155	252	160	46	46	46 bp mutant sequence added to a 206 bp wt telomere
	#156	160	160	0		#156	160	160	0
	#157	159	159	0		#157	159	159	0
	#158	159	159	0		#158	159	159	0
	#159	158	158	0		#159	158	158	0
	#160	156	156	0		#160	156	156	0
	#161	156	156	0		#161	156	156	0
	#162	182	156	26		#162	182	156	26
	#163	155	155	0		#163	155	155	0
	#164	155	155	0		#164	155	155	0
	#165	155	155	0		#165	155	155	0
	#166	155	155	0		#166	155	155	0
	#167	155	155	0		#167	155	155	0
	#168	155	155	0		#168	155	155	0
	#169	155	155	0		#169	155	155	0
	#170	155	155	0		#170	155	155	0
	#171	155	155	0		#171	155	155	0
	#172	177	155	22		#172	177	155	22
	#173	156	154	2		#173	156	154	2
	#174	153	153	0		#174	153	153	0
	#175	153	153	0		#175	153	153	0
	#176	153	153	0		#176	153	153	0
	#177	152	152	0		#177	152	152	0
	#178	152	152	0		#178	152	152	0
	#179	152	152	0		#179	152	152	0
	#180	152	152	0		#180	152	152	0
	#181	159	151	8		#181	159	151	8
	#182	151	151	0		#182	151	151	0
	#183	151	151	0		#183	151	151	0
	#184	151	151	0		#184	151	151	0
	#185	173	151	22		#185	173	151	22
	#186	150	150	0		#186	150	150	0
	#187	185	150	35		#187	185	150	35
	#188	150	150	0		#188	150	150	0
	#189	177	150	27		#189	177	150	27
	#190	176	150	0	26
	#191	149	149	0		#191	149	149	0
	#192	149	149	0		#192	149	149	0
	#193	149	149	0		#193	149	149	0
	#194	164	149	15		#194	164	149	15
	#195	148	148	0		#195	148	148	0
	#196	148	148	0		#196	148	148	0
	#197	148	148	0		#197	148	148	0
	#198	148	148	0		#198	148	148	0
	#199	147	147	0		#199	147	147	0
	#200	147	147	0		#200	147	147	0
	#201	147	147	0		#201	147	147	0
	#202	156	147	0	9
	#203	147	147	0		#203	147	147	0
	#204	146	146	0		#204	146	146	0
	#205	146	146	0		#205	146	146	0
	#206	155	146	9		#206	155	146	9
	#207	161	144	17		#207	161	144	17
	#208	144	144	0		#208	144	144	0
	#209	143	143	0		#209	143	143	0
	#210	143	143	0		#210	143	143	0
	#211	142	142	0		#211	142	142	0
	#212	169	142	27		#212	169	142	27
	#213	141	141	0		#213	141	141	0
	#214	140	140	0		#214	140	140	0
	#215	140	140	0		#215	140	140	0
	#216	165	140	0	25
	#217	140	140	0		#217	140	140	0
	#218	200	139	61		#218	200	139	61
	#219	164	139	25		#219	164	139	25
	#220	169	139	30		#220	169	139	30
	#221	167	139	28		#221	167	139	28
	#222	139	139	0		#222	139	139	0
	#223	138	138	0		#223	138	138	0
	#224	138	138	0		#224	138	138	0
	#225	186	138	48		#225	186	138	48
	#226	173	138	35		#226	173	138	35
	#227	138	138	0		#227	138	138	0
	#228	153	138	15		#228	153	138	15
	#229	137	137	0		#229	137	137	0
	#230	147	137	0	10
	#231	137	137	0		#231	137	137	0
	#232	137	137	0		#232	137	137	0
	#233	137	137	0		#233	137	137	0
	#234	135	135	0		#234	135	135	0
	#235	135	135	0		#235	135	135	0
	#236	154	134	20		#236	154	134	20
	#237	137	134	3		#237	137	134	3
	#238	172	134	38		#238	172	134	38
	#239	133	133	0		#239	133	133	0
	#240	195	133	62		#240	195	133	62
	#241	132	132	0		#241	132	132	0
	#242	132	132	0		#242	132	132	0
	#243	132	132	0		#243	132	132	0
	#244	132	132	0		#244	132	132	0
	#245	130	130	0		#245	130	130	0
	#246	184	130	54		#246	184	130	54
	#247	130	130	0		#247	130	130	0
	#248	130	130	0		#248	130	130	0
	#249	129	129	0		#249	129	129	0
	#250	175	129	46		#250	175	129	46
	#251	139	128	11		#251	139	128	11
	#252	173	128	45		#252	173	128	45
	#253	127	127	0		#253	127	127	0
	#254	127	127	0		#254	127	127	0
	#255	127	127	0		#255	127	127	0
	#256	127	127	0		#256	127	127	0
	#257	127	127	0		#257	127	127	0
	#258	126	126	0		#258	126	126	0
	#259	126	126	0		#259	126	126	0
	#260	126	126	0		#260	126	126	0
	#261	126	126	0		#261	126	126	0
	#262	126	126	0		#262	126	126	0
	#263	125	125	0		#263	125	125	0
	#264	147	125	22		#264	147	125	22
	#265	125	125	0		#265	125	125	0
	#266	135	125	10		#266	135	125	10
	#267	139	125	14		#267	139	125	14
	#268	165	123	42		#268	165	123	42
	#269	123	123	0		#269	123	123	0
	#270	124	122	2		#270	124	122	2
	#271	131	122	0	9
	#272	122	122	0		#272	122	122	0
	#273	121	121	0		#273	121	121	0
	#274	121	121	0		#274	121	121	0
	#275	120	120	0		#275	120	120	0
	#276	120	120	0		#276	120	120	0
	#277	120	120	0		#277	120	120	0
	#278	118	118	0		#278	118	118	0
	#279	118	118	0		#279	118	118	0
	#280	164	118	46		#280	164	118	46
	#281	122	118	4		#281	122	118	4
	#282	119	117	2		#282	119	117	2
	#283	143	116	27		#283	143	116	27
	#284	143	115	28		#284	143	115	28
	#285	133	115	18		#285	133	115	18
	#286	113	113	0		#286	113	113	0
	#287	112	112	0		#287	112	112	0
	#288	144	112	32		#288	144	112	32
	#289	175	111	64		#289	175	111	64
	#290	115	111	0	4
	#291	110	110	0		#291	110	110	0
	#292	110	110	0		#292	110	110	0
	#293	110	110	0		#293	110	110	0
	#294	110	110	0		#294	110	110	0
	#295	167	110	0	57
	#296	110	110	0		#296	110	110	0
	#297	118	109	9		#297	118	109	9
	#298	117	109	0	8
	#299	155	109	46		#299	155	109	46
	#300	108	108	0		#300	108	108	0
	#301	151	108	43		#301	151	108	43
	#302	108	108	0		#302	108	108	0
	#303	196	107	89		#303	196	107	89
	#304	127	107	20		#304	127	107	20
	#305	107	107	0		#305	107	107	0
	#306	106	106	0		#306	106	106	0
	#307	106	106	0		#307	106	106	0
	#308	156	106	50		#308	156	106	50
	#309	125	105	20		#309	125	105	20
	#310	104	104	0		#310	104	104	0
	#311	176	104	72		#311	176	104	72
	#312	128	103	25		#312	128	103	25
	#313	123	103	20		#313	123	103	20
	#314	103	103	0		#314	103	103	0
	#315	128	102	26		#315	128	102	26
	#316	142	102	40		#316	142	102	40
	#317	131	102	0	29
	#318	138	102	36		#318	138	102	36
	#319	130	102	28		#319	130	102	28
	#320	101	101	0		#320	101	101	0
	#321	108	101	7		#321	108	101	7
	#322	157	101	0	56
	#323	100	100	0		#323	100	100	0
	#324	100	100	0		#324	100	100	0
	#325	106	100	0	6
	#326	100	100	0		#326	100	100	0
	#327	100	100	0		#327	100	100	0
	#328	211	99	112		#328	211	99	112
	#329	99	99	0		#329	99	99	0
	#330	199	99	100		#330	199	99	100
	#331	98	98	0		#331	98	98	0
	#332	105	97	0	8
	#333	148	97	51		#333	148	97	51
	#334	116	97	19		#334	116	97	19
	#335	132	97	35		#335	132	97	35
	#336	114	96	18		#336	114	96	18
	#337	95	95	0		#337	95	95	0
	#338	132	94	38		#338	132	94	38
	#339	211	93	118		#339	211	93	118
	#340	110	92	18		#340	110	92	18
	#341	237	92	145		#341	237	92	145
	#342	165	91	0	74
	#343	91	91	0		#343	91	91	0
	#344	91	91	0		#344	91	91	0
	#345	98	88	10		#345	98	88	10
	#346	87	87	0		#346	87	87	0
	#347	87	87	0		#347	87	87	0
	#348	101	86	15		#348	101	86	15
	#349	88	86	2		#349	88	86	2
	#350	86	86	0		#350	86	86	0
	#351	158	85	73		#351	158	85	73
	#352	84	84	0		#352	84	84	0
	#353	84	84	0		#353	84	84	0
	#354	83	83	0		#354	83	83	0
	#355	83	83	0		#355	83	83	0
	#356	81	81	0		#356	81	81	0
	#357	156	81	75		#357	156	81	75
	#358	84	81	0	3
	#359	90	80	10		#359	90	80	10
	#360	180	80	0	100
	#361	121	80	41		#361	121	80	41
	#362	79	79	0		#362	79	79	0
	#363	78	78	0		#363	78	78	0
	#364	78	78	0		#364	78	78	0
	#365	78	78	0		#365	78	78	0
	#366	77	77	0		#366	77	77	0
	#367	111	77	34		#367	111	77	34
	#368	110	77	33		#368	110	77	33
	#369	83	77	0	6
	#370	75	75	0		#370	75	75	0
	#371	75	75	0		#371	75	75	0
	#372	82	75	0	7
	#373	119	74	45		#373	119	74	45
	#374	74	74	0		#374	74	74	0
	#375	80	74	6		#375	80	74	6
	#376	153	74	79		#376	153	74	79
	#377	74	74	0		#377	74	74	0
	#378	73	73	0		#378	73	73	0
	#379	88	73	0	15
	#380	156	73	23	60	#380	156	73	23	60	60 bp mutant sequence added to a 96 bp wt telomere
	#381	151	72	79		#381	151	72	79
	#382	353	72	281		#382	353	72	281
	#383	178	72	106		#383	178	72	106
	#384	86	72	14		#384	86	72	14
	#385	104	72	32		#385	104	72	32
	#386	77	72	0	5
	#387	95	72	23		#387	95	72	23
	#388	72	72	0		#388	72	72	0
	#389	71	71	0		#389	71	71	0
	#390	71	71	0		#390	71	71	0
	#391	296	71	225		#391	296	71	225
	#392	70	70	0		#392	70	70	0
	#393	68	68	0		#393	68	68	0
	#394	97	68	29		#394	97	68	29
	#395	68	68	0		#395	68	68	0
	#396	138	66	72		#396	138	66	72
	#397	66	66	0		#397	66	66	0
	#398	66	66	0		#398	66	66	0
	#399	64	64	0		#399	64	64	0
	#400	64	64	0		#400	64	64	0
	#401	64	64	0		#401	64	64	0
	#402	63	63	0		#402	63	63	0
	#403	232	62	170		#403	232	62	170
	#404	129	62	67		#404	129	62	67
	#405	193	62	131		#405	193	62	131
	#406	199	61	138		#406	199	61	138
	#407	90	61	29		#407	90	61	29
	#408	114	61	53		#408	114	61	53
	#409	98	61	37		#409	98	61	37
	#410	207	60	147		#410	207	60	147
	#411	135	60	75		#411	135	60	75
	#412	124	60	64		#412	124	60	64
	#413	193	60	45	88	#413	193	60	45	88	45 bp of mutant sequence added to a 60 bp wt telomere
	#414	70	60	0	10
	#415	182	60	122		#415	182	60	122
	#416	86	60	0	26
	#417	59	59	0		#417	59	59	0
	#418	59	59	0		#418	59	59	0
	#419	59	59	0		#419	59	59	0
	#420	58	58	0		#420	58	58	0
	#421	58	58	0		#421	58	58	0
	#422	69	58	0	11
	#423	57	57	0		#423	57	57	0
	#424	56	56	0		#424	56	56	0
	#425	56	56	0		#425	56	56	0
	#426	116	52	64		#426	116	52	64
	#427	133	52	81		#427	133	52	81
	#428	171	52	119		#428	171	52	119
	#429	109	51	58		#429	109	51	58
	#430	183	51	132		#430	183	51	132
	#431	201	50	151		#431	201	50	151
	#432	92	50	42		#432	92	50	42
	#433	73	50	23		#433	73	50	23
	#434	75	50	25		#434	75	50	25
	#435	126	50	76		#435	126	50	76
	#436	119	50	69		#436	119	50	69
	#437	170	49	121		#437	170	49	121
	#438	47	47	0		#438	47	47	0
	#439	121	47	74		#439	121	47	74
	#440	129	47	82		#440	129	47	82
	#441	78	47	31		#441	78	47	31
	#442	55	46	9		#442	55	46	9
	#443	75	46	29		#443	75	46	29
	#444	90	46	44		#444	90	46	44
	#445	62	46	16		#445	62	46	16
	#446	44	44	0		#446	44	44	0
	#447	124	44	80		#447	124	44	80
	#448	184	44	140		#448	184	44	140
	#449	99	44	0	55
	#450	132	44	13	75	#450	132	44	13	75	75 bp of mutant sequence added to a 57 bp wt telomere
	#451	43	43	0		#451	43	43	0
	#452	93	43	50		#452	93	43	50
	#453	42	42	0		#453	42	42	0
	#454	179	41	138		#454	179	41	138
	#455	148	41	0	107
	#456	40	40	0		#456	40	40	0
	#457	40	40	0		#457	40	40	0
	#458	121	36	85		#458	121	36	85
	#459	35	35	0		#459	35	35	0
	#460	34	34	0		#460	34	34	0
	#461	31	31	0		#461	31	31	0
	#462	50	31	19		#462	50	31	19
	#463	27	27	0		#463	27	27	0
	#464	27	27	0		#464	27	27	0
	#465	48	25	0	23
	#466	24	24	0		#466	24	24	0
	#467	24	24	0		#467	24	24	0
	#468	135	20	115		#468	135	20	115
	#469	16	16	0		#469	16	16	0
	#470	106	14	0	92
Average		148.628	131.285				# of telomeres below thershold	# of extended telomeres	p value
% diverged				31.9149	7.44681	V-R PIF1	32	2	0.041
Count				150	35	V-R pif1-m2	17	5
