# Supplementary material for: A sharp Pif1-dependent threshold separates DNA double-strand breaks from critically short telomeres
Source: eLife. 2017 Aug 3;6:e23783. doi: 10.7554/eLife.23783 (PMC5595431; doi:10.7554/eLife.23783)
Supplement: Figure 3—figure supplement 1—source data 1. [file elife-23783-fig3-figsupp1-data1.xlsx]

## Sheet: Sheet1
Figure 3 Supplement 1 - source data 1
	Corresponds to Data shown in Figure 3 Supplement 1b
	n=1 to 3 experiments, error bars represent s.d.
	sml1Δ			smlΔ pif1-m2			mec1Δ	sml1Δ mec1Δ pif1-m2
HO (h)	Exp 1	Exp 2	Exp 3	Exp 1	Exp 2	Exp 3	Exp 1	Exp 1
0	0.005535	0.014634	0.026525	0.002811	0.006522	0.009732	0.013562	0.004649
1	0.047334	0.042485	0.069791	0.043921	0.029935	0.068348	0.063187	0.0354
2	0.123308	0.090916	0.14845	0.242283	0.206623	0.313137	0.150553	0.136029
4	0.489375	0.518936	0.573439	0.545131	0.588211	0.615863	0.272015	0.296848
6	0.556118	0.656023	0.723706	0.674115	0.695017	0.741927	0.352522	0.396415
