# Supplementary material for: A sharp Pif1-dependent threshold separates DNA double-strand breaks from critically short telomeres
Source: eLife. 2017 Aug 3;6:e23783. doi: 10.7554/eLife.23783 (PMC5595431; doi:10.7554/eLife.23783)
Supplement: Figure 3—figure supplement 1—source data 2. [file elife-23783-fig3-figsupp1-data2.xlsx]

## Sheet: Sheet1
Figure 3 Supplement 1 - source data 2
	Corresponds to Data shown in Figure 3 Supplement 1d
	n=2 to 3 experiments, error bars represent s.d.
	sml1Δ			sml1Δ pif1-m2			rad53Δ		sml1Δ rad53Δ pif1-m2
HO (h)	Exp 1	Exp 2	Exp 3	Exp 1	Exp 2	Exp 3	Exp 1	Exp 2	Exp 1	Exp 2
0	0.00553508	0.0146345	0.026525	0.00281112	0.0065218	0.00973235	0.0262251	0.0398792	0.0362108	0.0353423
1	0.0473343	0.0424851	0.0697912	0.0439207	0.0299348	0.0683478	0.0771826	0.0895572	0.0497015	0.053901
2	0.123308	0.0909157	0.14845	0.242283	0.206623	0.313137	0.085846	0.125416	0.101537	0.157769
4	0.489375	0.518936	0.573439	0.545131	0.588211	0.615863	0.172064	0.206876	0.227933	0.275889
6	0.556118	0.656023	0.723706	0.674115	0.695017	0.741927	0.252926	0.286571	0.336052	0.385154
