# Supplementary material for: A sharp Pif1-dependent threshold separates DNA double-strand breaks from critically short telomeres
Source: eLife. 2017 Aug 3;6:e23783. doi: 10.7554/eLife.23783 (PMC5595431; doi:10.7554/eLife.23783)
Supplement: Figure 3—source data 1. [file elife-23783-fig3-data1.xlsx]

## Sheet: Sheet1
Figure 3 - source data 1
	Corresponds to Data shown in Figure 3b
	n=2 experiments, error bars represent s.d.
	WT		pif1-m2		tel1Δ		tel1Δ pif1-m2
HO (h)	Exp 1	Exp 2	Exp 1	Exp 2	Exp 1	Exp 2	Exp 1	Exp 2
0	0.0150989	0.0166418	0.00360841	0.0245945	0.030133	0.0313944	0.022759	0.0181687
1	0.0387587	0.0555868	0.0344686	0.0909802	0.0493955	0.107955	0.0342229	0.0399178
2	0.09462	0.136806	0.20062	0.223473	0.077282	0.118469	0.0664697	0.0885385
4	0.397155	0.465878	0.498224	0.497302	0.124319	0.187046	0.205744	0.230336
6	0.568237	0.553408	0.54868	0.605193	0.132525	0.215489	0.227917	0.321444
