# Supplementary material for: A sharp Pif1-dependent threshold separates DNA double-strand breaks from critically short telomeres
Source: eLife. 2017 Aug 3;6:e23783. doi: 10.7554/eLife.23783 (PMC5595431; doi:10.7554/eLife.23783)
Supplement: Figure 3—source data 3. [file elife-23783-fig3-data3.xlsx]

## Sheet: Sheet1
Figure 3 - source data 3
	Corresponds to Data shown in Figure 3d
	n=3 experiments, error bars represent s.d.
	Exp 1	Exp 2	Exp 3
-	87.8	90.3	94.3
WT	85.7	85.6	89.7
5AQ	87.2	90.4	90
