# Supplementary material for: A sharp Pif1-dependent threshold separates DNA double-strand breaks from critically short telomeres
Source: eLife. 2017 Aug 3;6:e23783. doi: 10.7554/eLife.23783 (PMC5595431; doi:10.7554/eLife.23783)
Supplement: Figure 4—source data 1. [file elife-23783-fig4-data1.xlsx]

## Sheet: Sheet1
Figure 4 - source data 1
	Corresponds to Data shown in Figure 4b
	n=3 to 6 experiments, error bars represent s.d.
	PIF1						pif1-m2
	Exp 1	Exp 2	Exp 3	Exp 4	Exp 5	Exp 6	Exp 1	Exp 2	Exp 3	Exp 4	Exp 5	Exp 6
-	1.4	0.4	1.1	1	1	0.6	64.4	60.4	60.4	60.5	64.8	66.2
Est1	4.3	4.9	5	5.5	5.6	6.4	74.5	74.7	72.7	72.9	69.1	73.1
Est2	0.4	1.2	1.1	2.46	2.33	2.8	66.4	73.3	71.52	69.81	70
Est1-K44E	1	0.9	1.2				60.8	61.4	57.9
