# Supplementary material for: A sharp Pif1-dependent threshold separates DNA double-strand breaks from critically short telomeres
Source: eLife. 2017 Aug 3;6:e23783. doi: 10.7554/eLife.23783 (PMC5595431; doi:10.7554/eLife.23783)
Supplement: Figure 4—source data 2. [file elife-23783-fig4-data2.xlsx]

## Sheet: Sheet1
Figure 4 - source data 2
	Corresponds to Data shown in Figure 4c
	n=3 to 7 experiments, error bars represent s.d.
		Exp 1	Exp 2	Exp 3	Exp 4	Exp 5	Exp 6	Exp 7
TG18	-	55.5	59.4	55.3	58.1	54.5	58.7	59.2
	WT	0.4	0.4	0.9	0	1.7	2
	4A	37	51.1	49	47.3	42.3	40.1
	4D	1.5	3.3	0.7
TG34	-	87.8	90.3	94.3
	WT	85.7	85.6	89.7
	4D	93.7	91.9	91.9
