# Supplementary material for: A sharp Pif1-dependent threshold separates DNA double-strand breaks from critically short telomeres
Source: eLife. 2017 Aug 3;6:e23783. doi: 10.7554/eLife.23783 (PMC5595431; doi:10.7554/eLife.23783)
Supplement: Figure 4—source data 3. [file elife-23783-fig4-data3.xlsx]

## Sheet: Sheet1
Figure 4 - source data 3
	Corresponds to Data shown in Figure 4e
	n=3 to 4 experiments, error bars represent s.d.
		PIF1				pif1-m2
		Exp 1	Exp 2	Exp 3	Exp 4	Exp 1	Exp 2	Exp 3	Exp 4
EST2	TG18	0.8	0.5	0	0	62.8	68.6	69.7	67
	TG34	85.1	89.1	87.4	86	85.4	93	84.9	90
est2-up34	TG18	0.4	0	0	0.7	81.3	76.4	79
	TG34	83.3	85	87.3	88.4	92.5	89.9	86.1	91.5
