# Supplementary material for: A sharp Pif1-dependent threshold separates DNA double-strand breaks from critically short telomeres
Source: eLife. 2017 Aug 3;6:e23783. doi: 10.7554/eLife.23783 (PMC5595431; doi:10.7554/eLife.23783)
Supplement: Figure 5—source data 1. [file elife-23783-fig5-data1.xlsx]

## Sheet: Sheet1
Figure 5 - source data 1
	Corresponds to Data shown in Figure 5a
	n=3 to 4 experiments, error bars represent s.d.
		PIF1				pif1-m2
		Exp 1	Exp 2	Exp 3	Exp 4	Exp 1	Exp 2	Exp 3	Exp 4
WT	TG18	0.8	0.5	0	0	62.8	68.6	69.7	67
	TG34	85.1	89.1	87.4	86	85.4	93	84.9	90
mre11Δ	TG18	1	1	1.32		62.2	75.8	71.99
	TG34	83.8	98.4	85		84.3	98.1	91.4
yku70Δ	TG18	0.5	0.3	0		49.3	55.7	55
	TG34	75.2	76	81.4		88	89	89.51
