# Supplementary material for: A sharp Pif1-dependent threshold separates DNA double-strand breaks from critically short telomeres
Source: eLife. 2017 Aug 3;6:e23783. doi: 10.7554/eLife.23783 (PMC5595431; doi:10.7554/eLife.23783)
Supplement: Figure 5—source data 2. [file elife-23783-fig5-data2.xlsx]

## Sheet: Sheet1
Figure 5 - source data 2
	Corresponds to Data shown in Figure 5b
	n=3 experiments, error bars represent s.d.
		PIF1			pif1-m2
		Exp 1	Exp 2	Exp 3	Exp 1	Exp 2	Exp 3
TGTGGn	TG26	0	0.043	0	0.835	1.251	0.914
	TG36	0.647	0.673	0.477	0.851	1.15	0.999
TGn	TG26	0.205	0.324	0.306	0.906	1.04	1.055
	TG36	1.013	0.997	0.927	1.006	1.118	0.876
