# Supplementary material for: A sharp Pif1-dependent threshold separates DNA double-strand breaks from critically short telomeres
Source: eLife. 2017 Aug 3;6:e23783. doi: 10.7554/eLife.23783 (PMC5595431; doi:10.7554/eLife.23783)
Supplement: Figure 5—source data 3. [file elife-23783-fig5-data3.xlsx]

## Sheet: Sheet1
Figure 5 - source data 3
	Corresponds to Data shown in Figure 5c
	n=3 to 4 experiments, error bars represent s.d.
		PIF1				pif1-m2
		Exp 1	Exp 2	Exp 3	Exp 4	Exp 1	Exp 2	Exp 3	Exp 4
WT	TG18	0.8	0.5	0	0	62.8	68.6	69.7	67
	TG34	85.1	89.1	87.4	86	85.4	93	84.9	90
rifΔ	TG18	0	0	0.238664		45.3287	44.8598	42.6282
	TG34	89.7727	95.082	95.0355		88.3333	88.785	82.7476
rif2Δ	TG18	0	0	0		69.5455	67.1642	61.2167
	TG34	61.062	87.7778	89.9306		91.8919	95.3846	83.2512
rif1Δ rif2Δ	TG18	0.452489	0.390625	0.277778		21.7105	25.5319	27.4809
	TG34	70	70.7792	61.194		49.3056	51.938	50.9804
