# Supplementary material for: A sharp Pif1-dependent threshold separates DNA double-strand breaks from critically short telomeres
Source: eLife. 2017 Aug 3;6:e23783. doi: 10.7554/eLife.23783 (PMC5595431; doi:10.7554/eLife.23783)
Supplement: Figure 6—source data 1. [file elife-23783-fig6-data1.xlsx]

## Sheet: Sheet1
Figure 6 - source data 1
	Corresponds to Data shown in Figure 6b
	n=3 to 9 experiments, error bars represent s.d.
		PIF1									pif1-m2									PIF1		pif1-m2
		Exp 1	Exp 2	Exp 3	Exp 4	Exp 5	Exp 6	Exp 7	Exp 8	Exp 9	Exp 1	Exp 2	Exp 3	Exp 4	Exp 5	Exp 6	Exp 7	Exp 8	Exp 9	mean	s. d.	mean	s. d.
WT low copy	TG18	0	0	0	0	0	0				21.3043	29.434	28.4483	37.5	26.1905					0	0	28.5754	5.89402
	TG34	62.1622	66.6667	58	60.6061	56.5041	53.7313				89.8438	89.5928	87.8505	97.7337	95.4155	91.6149				59.6117	4.56289	92.0085	3.80399
L91A low copy	TG18	0	0.315457	0	0	0.884956	0				7.93103	4.95283	5.97345	8.78049	8.62069	6.81818				0.200069	0.358468	7.17945	1.53285
	TG34	2.18978	0	0	4.16667	2.7027					65.7097	58.6826	61.9048	75.1196	72	76.087				1.81183	1.80605	68.2506	7.22387
WT high copy	TG18	3.43348	2.39044	1.85185							50	46.8085	42.2018							2.55859	0.804108	46.3368	3.92043
	TG34	82.4444	85.3132	75.8442	74.6324	82.4444	85.3132	75	70.5882	83.3333	76.5625	81.1881	93.8406	82.5462	76.5625	81.1881	100	96.8254	91.3043	79.4348	5.43496	86.6686	8.91029
L91A high copy	TG18	0.763359	0	0							25.3731	26.6667	26.8293							0.254453	0.440725	26.2897	0.797913
	TG34	57.2632	59.8394	53.2934	57.194	57.2632	59.8394				85.5422	77.0909	86.2676	83.3948	85.5422	77.0909	90.7407	69.2308		57.4487	2.40128	81.8625	6.89464
