# Supplementary material for: A sharp Pif1-dependent threshold separates DNA double-strand breaks from critically short telomeres
Source: eLife. 2017 Aug 3;6:e23783. doi: 10.7554/eLife.23783 (PMC5595431; doi:10.7554/eLife.23783)
Supplement: Figure 6—source data 2. [file elife-23783-fig6-data2.xlsx]

## Sheet: Sheet1
Figure 6 - source data 2
	Corresponds to Data shown in Figure 6f
	n=1 to 2 experiments, error bars represent s.d.
	PIF1		pif1-m2
	Exp 1	Exp 2	Exp 1	Exp 2
WT	82.3188	85.5263	81.7518	90.3553
#7	60.274		67.2131
#14	41.7085		56.5217
#37	0		5.55556
#48	0		23.4694
#79	0		16.9491
#80	0		32.6531
#81	1.06383		14.7541
sp1	6.74157	7.14286	78.5714	52.071
sp2	7.31707	7.14286	67.4419	45.3333
sp3	1.36986	9.09091	65.0307	46.875
sp42	3.84615	7.69231	65.2778	38.5965
sp63	4.05405	4.42478	60.7143	65.942
sp72	5.97015	15.1899	75	58.4906
sp71	31.8966		76.699
sp77	18.6916	6.12245	51.9231	43.2763
