# Supplementary material for: A sharp Pif1-dependent threshold separates DNA double-strand breaks from critically short telomeres
Source: eLife. 2017 Aug 3;6:e23783. doi: 10.7554/eLife.23783 (PMC5595431; doi:10.7554/eLife.23783)
Supplement: Figure 7—source data 1. [file elife-23783-fig7-data1.xlsx]

## Sheet: Sheet1
Figure 8 - source data 1
	Corresponds to Data shown in Figure 7a
	n=3 to 6 experiments, error bars represent s.d.
	PIF1						pif1-m2
	Exp 1	Exp 2	Exp 3	Exp 4	Exp 5	Exp 6	Exp 1	Exp 2	Exp 3	Exp 4	Exp 5	Exp 6
WT	82.4444	85.3132	75.8441	74.6324	82.3188	85.5263	76.5625	81.1881	93.8406	82.5462	81.7518	90.3553
L91A	57.2632	59.8394	53.2934	57.194	55.597	40.404	85.5422	77.0909	86.2676	83.3948	68.3849	72.2543
F236S	7.89474	9.7561	10.4348	7.59878			63.3094	64.3678		78.83
S255A	0	0	1	2.22	1.96		75	83	58.62	57.59	47.37
Q256H	6.05469	8.12379	5.49451	12.4183			55.7576	57.8125	75.9076	70.354
Q583K	44.1861	36.0515	42.0904	23.0303			79.4271	80.7018	85.1393	84.1686
I87N	41.7266	38.8747	29.9595				81.0606	79.9107	91.1111
Y758N	42.0079	34.4118	31.1				73.9726	79.7222	81.9149
H12R	58.8055	59.5541	80.3136				84.6591	82.6347	93.8326
E566V N567D	55.0702	65.042	80.625				79.3103	91.6168	83.4783
F728I	54.162	55.9896	67.1717				80.543	82.9268	84.9162
