# Supplementary material for: A sharp Pif1-dependent threshold separates DNA double-strand breaks from critically short telomeres
Source: eLife. 2017 Aug 3;6:e23783. doi: 10.7554/eLife.23783 (PMC5595431; doi:10.7554/eLife.23783)
Supplement: Figure 7—source data 2. [file elife-23783-fig7-data2.xlsx]

## Sheet: Sheet1
Figure 8 - source data 2
	Corresponds to Data shown in Figure 7b
	n=3 to 6 experiments, error bars represent s.d.
	PIF1						pif1-m2
	Exp 1	Exp 2	Exp 3	Exp 4	Exp 5	Exp 6	Exp 1	Exp 2	Exp 3	Exp 4	Exp 5	Exp 6
WT	82.4444	85.3132	75.8441	74.6324	82.3188	85.5263	76.5625	81.1881	93.8406	82.5462	81.7518	90.3553
cdc13-2 E252K	0	0	0	0.6879			48.39	37.14	43.9	48.276	65.21
cdc13-1 P371S	6.2	3.3	4.9				88.6	78.5	76.7
F236S E252K Q583K	0	0.9	1.6				16.6	15	7.5
