# Supplementary material for: A sharp Pif1-dependent threshold separates DNA double-strand breaks from critically short telomeres
Source: eLife. 2017 Aug 3;6:e23783. doi: 10.7554/eLife.23783 (PMC5595431; doi:10.7554/eLife.23783)
Supplement: Figure 7—source data 3. [file elife-23783-fig7-data3.xlsx]

## Sheet: Sheet1
Figure 8 - source data 3
	Corresponds to Data shown in Figure 7e
	n=3 to 9 experiments, error bars represent s.d.
	Cdc13 WT low copy								Cdc13 Q256H low copy
	PIF1			pif1-m2					PIF1			pif1-m2
	Exp 1	Exp 2	Exp 3	Exp 1	Exp 2	Exp 3			Exp 1	Exp 2	Exp 3	Exp 1	Exp 2	Exp 3
TG18	0.307692	0	0.436681	12.585	10.3175	12.8302		TG18	0	0	0	1.92308	2.47934	1.99005
TG34	73.3945	63.9175	49.5868	86.1298	83	80.3636		TG34	0	0.881057	0	53.5714	56.8306	55.2941
TG42	86.8421	86.8545	77.2487	92.6366	83.3935	77.0073		TG42	0	0.740741	0.826446	71.6981	64.0816	68.75
TG50	76.1261	83.391	68.1102	89.8058	81.2865	80.4281		TG50	0	2.6393	2.68097	82.7957	60.3922	66.1238
TG58	68.1388		63.1206	87.8723	77.4194	76.6017		TG58	0	5.59284	4.96894	66.6667	72.6158	75
TG66	81.7978	71.7489	66.9091	77.5556	66.9492	76.3441		TG66	3.84615	5.34759	5.04202	68.6869	69.9041	56.5
TG74	79.7619	75.969	64.8276	81.713	76.2755	62.7451		TG74	12.9032	15.6863	12.2924	73.2673	75.625	84.7645
TG82	71.0438	77.8157	67.3993	86.3057	77.9661	77.8169		TG82	27.2727	40.8192	31.9182	79.3651	62.2596	72.3301
	Cdc13 WT high copy
	PIF1						pif1-m2
	Exp 1	Exp 2	Exp 3	Exp 4	Exp 5	Exp 6	Exp 1	Exp 2	Exp 3	Exp 4	Exp 5	Exp 6
TG18	0	0	0				37.1795	30.3797	38.7097
TG34	90.9091	92.3077	100				84.2105	87.5	44.4444	97.2603	87.5
TG42	96.7742	100	96.7742				80	84.6154	78.5714
TG50	93.75	90.4762	94.1176				83.75	87.5	91.9463
TG58	70.8333	82.4742	87.8049				100	92.8571	94.7368
TG66	80.198	87.6543	86.5979				100	85	90.4762
TG74	82.0896	82.6087	75.5102				81.5534	82.4	88.3495
TG82	42.8571	78.6325	89.951	80	88.8889	76.1905	90.9091	68.4211	56.8966	70	82.3529	79.1667
	Cdc13 Q256H high copy
	PIF1									pif1-m2
	Exp 1	Exp 2	Exp 3	Exp 4	Exp 5	Exp 6	Exp 7	Exp 8	Exp 9	Exp 1	Exp 2	Exp 3	Exp 4	Exp 5	Exp 6	Exp 7	Exp 8	Exp 9
TG18	0	3.15315	6.56566	3.60825						5.09554	0	0	0	0	0	0
TG34	9.57447	38.0952	8.33333	25.8065	4.6875	21.6216	20			66.21	85.7143	60	81.4815	100
TG42	43.4783	11.1111	27.5	42.9907	40.9091	45.8333				92.3636	92.4051	93.8272	80.7692	91.6667	86.7925	66.6667	80.303
TG50	48.927	47.8261	78.4314	45.1613	68.3333	46.0526				88.0208	86.9258	87.3832	91.0959	93.0233	92.1053	87.9747	90.4762	88.8889
TG58	47.1264	56.9444	47.0588	42.3077						91.2037	83.5616	74.5455	86.0759
TG66	77.8555	50	55.3846	44.4444	50	46.3768				93.6073	70.8661	70.2532	80.226
TG74	89.6414	64.486	72.6415	62.9921						91.3462	88.8889	51.6667	80	70.5882	69.2308	83.3333
TG82	80.5949	87.6033	92.5373	93.3486	44.4444	42.1053	70.8333	80.9353	72.0721	83.8174	91.9679	95.6954	91.0494	82.3529	74.6479	77.4648	75
